# Supplementary material
Source: PubMed Central journal article supplement (PMC2293186)

Compositional differences for A (by codon position)

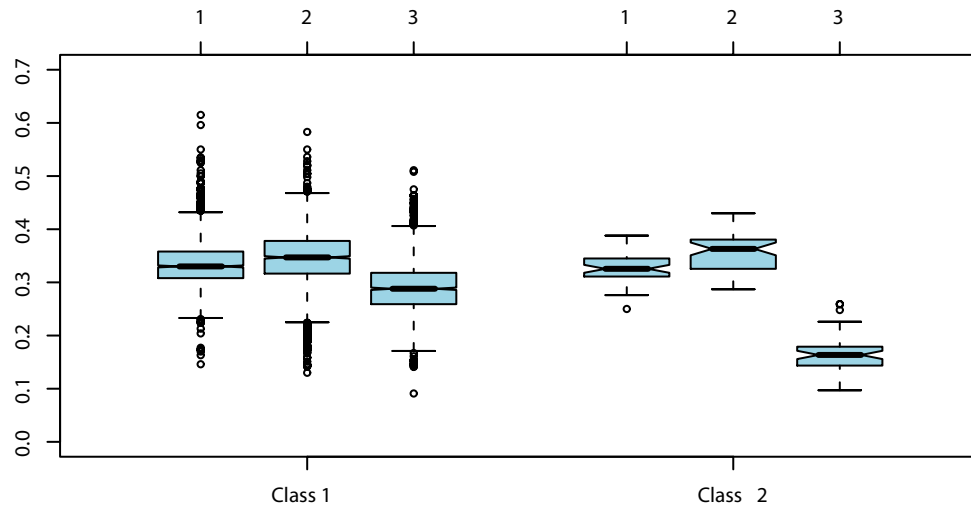

Compositional differences for T (by codon position)

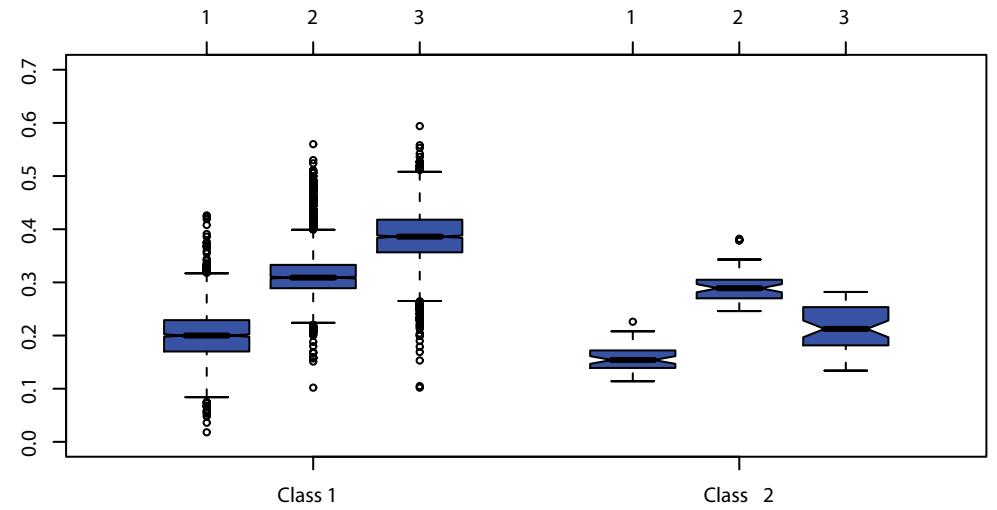

Compositional differences for C (by codon position)

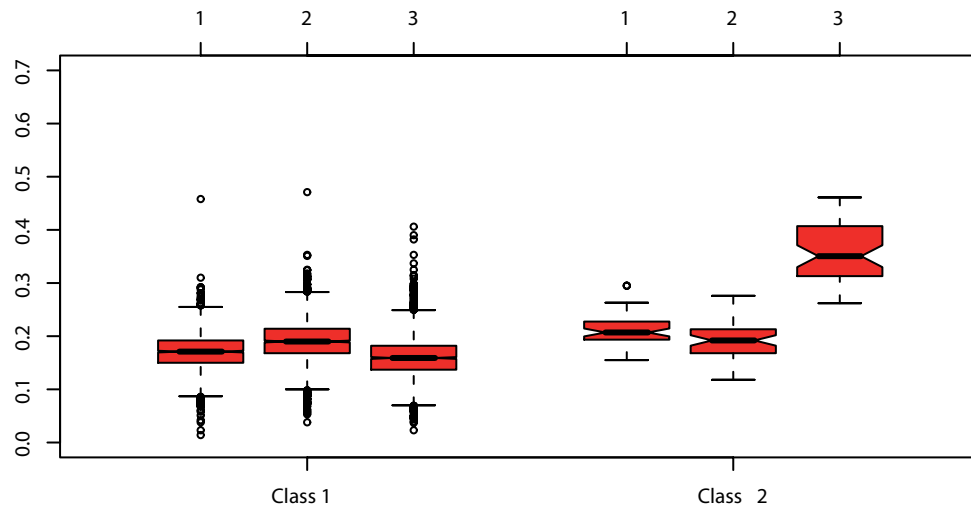

Compositional differences for G (by codon position)

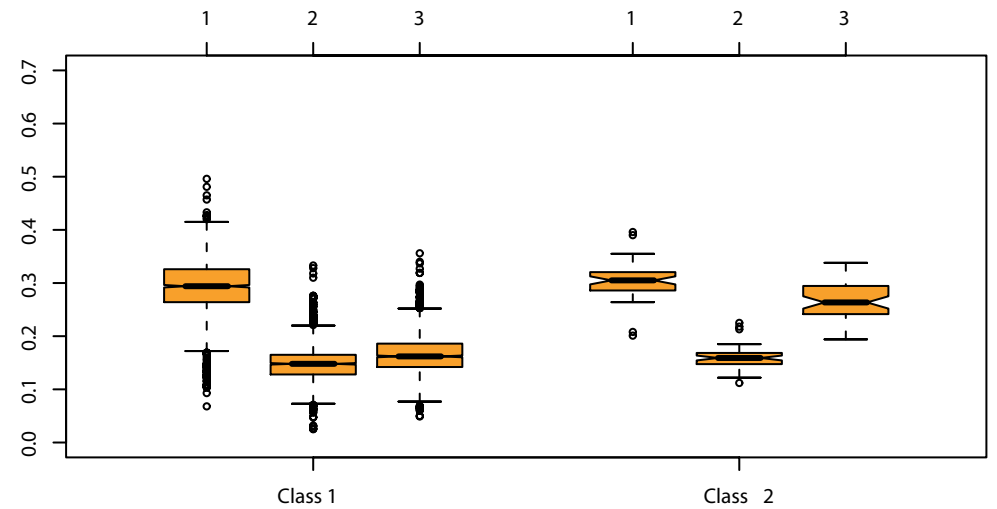

Supplement: jbacter_190_7_2572__1.pdf [file jbacter_190_7_2572__1.pdf]
