# Supplementary material
Source: PubMed Central journal article supplement (PMC2293186)
Supplement: jbacter_190_7_2572__2.pdf [file jbacter_190_7_2572__2.pdf]

| Name                  | Forward primer             | Reverse primer             |
|-----------------------|----------------------------|----------------------------|
| Cloam0029             | ATTATGGGAGCAAGATAATTGGTC   | ATAGATAAGTCCATCCAAGTGACC   |
| Cloam0031             | AAGGAATTGGGAGATTGCTTTG     | CTAAAAGTAAACCACCGATAATAGTG |
| Cloam0088             | AATGTTAAGCGTAGAGGGATAAGG   | GGCAAATATGGCTAAAAGGAATCC   |
| Cloam0128             | GCATCTATAAGTTCCATCTGATTATG | AGGCAAAACGATTATAACTATTTCTC |
| Cloam0165             | CGGACTTCTTTTCTACAATGAAGG   | TAATGCAGGATAGATACAGGGATG   |
| Cloam0166             | CCTGGTGCTATAGGATAGAAATATC  | AGGCGATTCTAATGAAGAAAATAGC  |
| Cloam0225             | CCTTCTGATCCTGCTTCATCATG    | GCTCCGGGAGTATGCCAAG        |
| Cloam0246             | CGAGTTAACCTCTTTTCTTCGTG    | AATAGTAAGCCATTTGTCATTCTTG  |
| Cloam0294             | AATCAATTTGTGGGTTGTGTATAAC  | TAAAGATAAAACCTGAAGCGAATATC |
| Cloam0295             | GCATTGCTTTCAAATTAAGGTCTAC  | CGGAATCCTGATTATTGATACTACC  |
| Cloam0303             | ATTATTTCCAAGCGTCATACACC    | GGAATGATATGCAGATGAAAATGG   |
| Cloam0314             | GTTACCATCCAGCAGCAAACG      | ATAATCATAGAAGAGGCGGTCTCTG  |
| Cloam0336             | AGCAACTTGAAATCCGATATTTCC   | ATAAGGACAATAACGGCTGGTTC    |
| Cloam0457             | TACATCAAATTCTGTCTGTTCCCTC  | CTCCAGTAGCCGCTGTTATG       |
| Cloam0640             | TTACCCGAACCTTGACTTGAATACC  | TCTATCTTCACCCCTTCAACTCCTG  |
| Cloam0816             | TTTATCTATTGTAGGGCTAAGTGC   | AATGGCTATCCTGGAAGTTAATTC   |
| Cloam1552             | CATTGCCACAGCATTTTTCAC      | ATCGCCAAACAAATTAAGCCATC    |
| Cloam1564             | AGAAAACCACCAGTCATAGCC      | AATGAATTGATTGGAGACAAAGTG   |
| Cloam1711             | CCCTTATTCAACCTTGCCTTATCC   | ACTTCAATCTGCCAGTTTTCTCTC   |
| Cloam0073-Cloam0074   | CTTGACATTATTGACTGTATTCACAC | CTATTGCCAAGTTGCTTTAATGTG   |
| Cloam0119-Cloam0121   | AGAATGAAAATCTTGAGTCCTAACC  | AGAGTCGTTGGTTTCGATTCC      |
| Cloam0187-Cloam0188   | ACAGGGATTTACAGATGAATTTAAC  | AAAATGGCTTCACGGATGTAATTC   |
| Cloam0261-Cloam0262   | GTCGTTAGTATATGTCGTTCCCTACG | ATCAGTTCTTCCTTAATTGCATTGC  |
| Cloam0283-Cloam0285   | GGGTTGAGAAGGTTGAGAGG       | TCGGGGATTTCATTTTAACGAG     |
| Cloam0333-Cloam0334   | AAACCACTCAACTACACTTCTATG   | GCTATCTAAAGCTATCCTGATCAC   |
| Cloam0528-Cloam0529   | AAATCCTGTCATCCCACCAG       | AATCCTGTTTCATCACCTACCTATTC |
| Cloam1312-Cloam1313   | GAGATGCCCTCAGCTCTCTG       | CGTAACACTTCCGTTGTCTCG      |
| Cloam1474-Cloam1476   | CAGCAATTAGTTCTACCGCATCC    | TGGTTTCGACAGGGAATCAGAG     |
| Cloam1554-Cloam_23S_1 | ATACTCTGCGAAATCTGCGTAAAC   | GATGGTACTGCACGGGCAAC       |
| Cloam1567-Cloam1568   | CAACCATCTAAACCTTATTTCCG    | GTCAAATGGAAAACAAAAGTAGGG   |

**Supplementary Table1.** Sequence of the 30 "*Candidatus Cloacamonas acidaminovorans*" specific PCR primer sets used in this study.
