# Supplementary material
Source: PubMed Central journal article supplement (PMC2293186)
Supplement: jbacter_190_7_2572__4.pdf [file jbacter_190_7_2572__4.pdf]

## 1. INFORMATION STORAGE AND PROCESSING

### 1.1. DNA metabolism

#### 1.1.1. Basic replication machinery (13 Results ordered by gene name)

| Gene name <sup>a</sup> | Product <sup>b</sup>              | Locus_tag <sup>c</sup> | Ref Gene name <sup>d</sup> | Ref Product <sup>e</sup>                                                                        | RefSeq CG & WGS Best hit <sup>g</sup>     | Clade Best hit <sup>h</sup> | Mode Best hit <sup>i</sup> | %id <sup>j</sup> |
|------------------------|-----------------------------------|------------------------|----------------------------|-------------------------------------------------------------------------------------------------|-------------------------------------------|-----------------------------|----------------------------|------------------|
| dnaB                   | replicative DNA helicase          | Cloam1089              | dnaB                       | replicative DNA helicase                                                                        | Clostridium beijerincki NCIMB 8052        | Firmicutes                  |                            | 44,4             |
| dnaE                   | DNA polymerase III, subunit       | Cloam1746              | dnaE                       | DNA polymerase III, alpha subunit                                                               | Salinibacter ruber DSM 13855              | Bacteroidetes/Chlorobi      | anaero.                    | 43,3             |
| dnaG                   | DNA primase                       | Cloam1825              | dnaG                       | DNA primase                                                                                     | Halothermothrix orenii H 168              | Firmicutes                  | anaero.                    | 33,6             |
| dnaN                   | DNA polymerase III, subunit       | Cloam1536              |                            | putative DNA polymerase III, beta chain (dnaN-like)                                             | Bdellovibrio bacteriovorus HD100          | Deltaproteobacteria         | aero.                      | 29,2             |
| dnaQ                   | DNA polymerase III, subunit       | Cloam1545              |                            | putative DNA polymerase III, epsilon subunit: DnaQ exonuclease (dnaQ-like) (DinG-like helicase) | Symbiobacterium thermophilum IAM 14863    | Actinobacteria              | micro.                     | 33,5             |
| dnaX                   | DNA polymerase III, and subunits  | Cloam1210              |                            | putative DNA polymerase III, gamma/tau subunits                                                 | Pelobacter propionicus DSM 2379           | Deltaproteobacteria         | anaero.                    | 48,5             |
| gyrA                   | DNA gyrase, A subunit             | Cloam1331              | gyrA                       | DNA gyrase, A subunit                                                                           | Chlorobium limicola DSM 245               | Bacteroidetes/Chlorobi      | anaero.                    | 53,8             |
| gyrB                   | DNA gyrase, B subunit             | Cloam1332              | gyrB                       | DNA gyrase (topoisomerase II) B subunit                                                         | Thermoanaerobacter ethanolicus ATCC 33223 | Firmicutes                  | anaero.                    | 62,6             |
| hoIA                   | DNA polymerase III, subunit       | Cloam1040              |                            | putative DNA polymerase III, delta subunit (hoIA-like)                                          | Geobacter sulfurreducens PCA              | Deltaproteobacteria         | anaero.                    | 21,1             |
| hoIB*                  | DNA polymerase III, ' subunit     | Cloam0793              |                            | DNA polymerase III, ' subunit (hoIB-like)                                                       | Thermoanaerobacter tengcongensis MB4      | Firmicutes                  | anaero.                    | 29,1             |
| hupA                   | DNA-binding protein               | Cloam0973              | hupA                       | DNA-binding protein HU-alpha (HU-2), plays a role in DNA replication and in rpo translation     | Symbiobacterium thermophilum IAM 14863    | Actinobacteria              | micro.                     | 53,9             |
| lig                    | DNA ligase (NAD-dependent)        | Cloam0968              | ligA                       | DNA ligase, NAD-dependent                                                                       | Thermoanaerobacter tengcongensis MB4      | Firmicutes                  | anaero.                    | 44,7             |
| ssb                    | single-strand DNA-binding protein | Cloam1609              |                            | putative single-strand binding protein (ssb-like)                                               | Desulfuromonas acetoxidans DSM 684        | Deltaproteobacteria         | anaero.                    | 41,4             |

## 1. INFORMATION STORAGE AND PROCESSING

### 1.1. DNA metabolism

#### 1.1.2. DNA repair, restriction, and modification (3 Results ordered by gene name)

| Gene name | Product                                      | Locus_tag | Ref Gene name | Ref Product                          | RefSeq CG & WGS Best hit        | Clade Best hit         | Mode Best hit | %id  |
|-----------|----------------------------------------------|-----------|---------------|--------------------------------------|---------------------------------|------------------------|---------------|------|
| nth       | endonuclease III                             | Cloam0039 |               | putative endonuclease III (nth-like) | Desulfotalea psychrophila Lsv54 | Deltaproteobacteria    | anaero.       | 56,7 |
| poIA      | 5'-3' exonuclease domain of DNA polymerase I | Cloam1364 | poIA          | DNA polymerase I                     | Thermotoga maritima MSB8        | Thermotogae            | anaero.       | 42,6 |
| ung*      | uracil-DNA glycosylase                       | Cloam0287 | ung           | uracil-DNA glycosylase               | Chlorobium limicola DSM 245     | Bacteroidetes/Chlorobi | anaero.       | 48,8 |

**1. INFORMATION STORAGE AND PROCESSING**  
**1.2. RNA metabolism**  
**1.2.1. Basic transcription machinery (8 Results ordered by gene name)**

| Gene name | Product                               | Locus_tag | Ref Gene name | Ref Product                                                                                                             | RefSeq CG & WGS Best hit                  | Clade Best hit         | Mode Best hit | %id  |
|-----------|---------------------------------------|-----------|---------------|-------------------------------------------------------------------------------------------------------------------------|-------------------------------------------|------------------------|---------------|------|
| deaD      | ATP-dependent RNA helicase            | Cloam1879 |               | putative helicase yprA (modular protein)                                                                                | Symbiobacterium thermophilum IAM 14863    | Actinobacteria         | micro.        | 43,9 |
| greA      | transcription elongation factor       | Cloam0049 |               | putative transcription elongation factor (GreA)                                                                         | Syntrophobacter fumaroxidans MPOB         | Deltaproteobacteria    | anaero.       | 39,6 |
| nusA      | transcription translation coupling    | Cloam0263 | nusA          | N utilization substance protein A                                                                                       | Carboxydotherrnus hydrogenoformans Z-2901 | Firmicutes             | anaero.       | 36,6 |
| nusG      | transcription antitermination protein | Cloam0461 | nusG          | transcription antitermination protein NusG                                                                              | Flavobacterium johnsoniae UW101           | Bacteroidetes/Chlorobi | aero.         | 43,5 |
| rpoA      | RNA polymerase, a subunit             | Cloam1113 | rpoA          | DNA-directed RNA polymerase alpha chain (RNAP alpha subunit) (Transcriptase alpha chain) (RNA polymerase alpha subunit) | Desulfuromonas acetoxidans DSM 684        | Deltaproteobacteria    | anaero.       | 45,9 |
| rpoB      | RNA polymerase, b subunit             | Cloam0456 | rpoB          | RNA polymerase, beta subunit                                                                                            | Salinibacter ruber DSM 13855              | Bacteroidetes/Chlorobi | aero.         | 49,6 |
| rpoC      | RNA polymerase, b' subunit            | Cloam0455 | rpoC          | RNA polymerase, beta' subunit; binds Zn(II)                                                                             | Geobacter metallireducens                 |                        |               | 51,1 |
| rpoD      | RNA polymerase major factor           | Cloam1826 | rpoD          | RNA polymerase sigma factor                                                                                             | Desulfuromonas acetoxidans DSM 684        | Deltaproteobacteria    | anaero.       | 43,9 |

**1. INFORMATION STORAGE AND PROCESSING**  
**1.2. RNA metabolism**  
**1.2.2. Translation**  
**1.2.2.1. Aminoacyl-tRNA synthesis (21 Results ordered by gene name)**

| Gene name | Product                       | Locus_tag | Ref Gene name | Ref Product                                                                   | RefSeq CG & WGS Best hit              | Clade Best hit         | Mode Best hit | %id  |
|-----------|-------------------------------|-----------|---------------|-------------------------------------------------------------------------------|---------------------------------------|------------------------|---------------|------|
| alaS      | alanyl-tRNA synthase          | Cloam1696 | alaS          | alanyl-tRNA synthetase                                                        | Chlorobium tepidum TLS                | Bacteroidetes/Chlorobi | anaero.       | 48,3 |
| argS      | arginyl-tRNA synthase         | Cloam0359 |               | Arginyl-tRNA synthetase 1 (EC 6.1.1.19) (Arginine--tRNA ligase 1) (ArgRS 1)   | Bacillus halodurans C-125             | Firmicutes             | fac.          | 43   |
| asnS      | asparaginylyl-tRNA synthase   | Cloam0728 |               | Asparaginylyl-tRNA synthetase (EC 6.1.1.22) (Asparagine--tRNA ligase) (AsnRS) | Desulfotomaculum reducens MI-1        | Firmicutes             | anaero.       | 52,2 |
| aspS      | aspartyl-tRNA synthase        | Cloam1540 | aspS          | aspartyl-tRNA synthetase                                                      | Thermoanaerobacter tengcongensis MB4  | Firmicutes             | anaero.       | 53,5 |
| cysS      | cysteinyl-tRNA synthase       | Cloam0734 | cysS          | cysteinyl-tRNA synthetase                                                     | Clostridium thermocellum ATCC 27405   | Firmicutes             | anaero.       | 52,3 |
| glnS      | glutaminylyl-tRNA synthase    | Cloam1207 | glnS          | glutamine tRNA synthetase                                                     | Clostridium thermocellum ATCC 27405   | Firmicutes             | anaero.       | 63,8 |
| gltX      | glutamyl-tRNA synthase        | Cloam0997 | gltX          | Glutamyl-tRNA synthetase (Glutamate--tRNA ligase) (GluRS)                     | Prosthecochloris vibrioformis DSM 265 | Bacteroidetes/Chlorobi | fac.          | 47   |
| glyS      | glycyl-tRNA synthase, subunit | Cloam0616 |               | putative glycine tRNA synthetase, beta subunit                                | Clostridium difficile QCD-32g58       | Firmicutes             | anaero.       | 37,2 |
| hisS      | histidyl-tRNA synthase        | Cloam0515 | hisS          | histidyl-tRNA synthetase                                                      | Thermoanaerobacter tengcongensis MB4  | Firmicutes             | anaero.       | 50,4 |
| ileS      | isoleucyl-tRNA synthase       | Cloam0569 |               | Isoleucyl-tRNA synthetase (EC 6.1.1.5) (Isoleucine--tRNA ligase) (IleRS)      | Alkaliphilus metalliredigenes QYMF    | Firmicutes             |               | 51,7 |

|      |                                     |           |      |                                                                           |                                                           |                        |         |      |
|------|-------------------------------------|-----------|------|---------------------------------------------------------------------------|-----------------------------------------------------------|------------------------|---------|------|
| leuS | leucyl-tRNA synthase                | Cloam1110 | leuS | leucyl-tRNA synthetase                                                    | Desulfovibrio vulgaris subsp. vulgaris str. Hildenborough | Deltaproteobacteria    | anaero. | 51,7 |
| lysS | lysyl-tRNA synthase                 | Cloam1688 | lysS | lysyl-tRNA synthetase                                                     | Chlorobium chlorochromatii CaD3                           | Bacteroidetes/Chlorobi |         | 50,3 |
| metS | methionyl-tRNA synthase             | Cloam0440 |      | Methionyl-tRNA synthetase (EC 6.1.1.10) (Methionine--tRNA ligase) (MetRS) | Thermococcus kodakarensis KOD1                            | Euryarchaeota          | anaero. | 44,7 |
| pheS | phenylalanyl-tRNA synthase, subunit | Cloam0533 | pheS | phenylalanine tRNA synthetase, alpha-subunit                              | Thermoanaerobacter ethanolicus ATCC 33223                 | Firmicutes             | anaero. | 54,3 |
| pheT | phenylalanyl-tRNA synthase, subunit | Cloam0534 | pheT | phenylalanyl-tRNA synthetase, beta subunit                                | Geobacter sulfurreducens PCA                              | Deltaproteobacteria    | anaero. | 35,8 |
| proS | prolyl-tRNA synthase                | Cloam0426 |      | Prolyl-tRNA synthetase (EC 6.1.1.15) (Proline--tRNA ligase) (ProRS)       | Blastopirellula marina DSM 3645                           | Planctomycetes         |         | 60   |
| serS | seryl-tRNA synthase                 | Cloam1669 | serS | seryl-tRNA synthetase                                                     | Thermoanaerobacter ethanolicus ATCC 33223                 | Firmicutes             | anaero. | 51,7 |
| thrS | threonyl-tRNA synthase              | Cloam0744 | thrS | threonyl-tRNA synthetase                                                  | Nitrosococcus oceani ATCC 19707                           | Gammaproteobacteria    |         | 55,4 |
| trpS | tryptophanyl-tRNA synthase          | Cloam1432 |      | Tryptophanyl-tRNA synthetase (EC 6.1.1.2)                                 | Francisella tularensis subsp. tularensis Schu 4           | Gammaproteobacteria    | aero.   | 53,6 |
| tyrS | tyrosyl-tRNA synthase               | Cloam0627 | tyrS | tyrosyl-tRNA synthetase                                                   | Caldicellulosiruptor saccharolyticus DSM 8903             | Firmicutes             | anaero. | 51   |
| valS | valyl-tRNA synthase                 | Cloam0259 | valS | valyl-tRNA synthetase                                                     | Halothermothrix orenii H 168                              | Firmicutes             | anaero. | 51,8 |

## 1. INFORMATION STORAGE AND PROCESSING

### 1.2. RNA metabolism

#### 1.2.2. Translation

##### 1.2.2.2. tRNA maturation and modification (6 Results ordered by gene name)

| Gene name | Product                                                                                             | Locus_tag | Ref Gene name | Ref Product                                                                          | RefSeq CG & WGS Best hit            | Clade Best hit      | Mode Best hit | %id  |
|-----------|-----------------------------------------------------------------------------------------------------|-----------|---------------|--------------------------------------------------------------------------------------|-------------------------------------|---------------------|---------------|------|
| mnmA      | tRNA (5-methylaminomethyl-2-thiouridylate) methyltransferase                                        | Cloam1161 | trmU          | tRNA (5-methylaminomethyl-2-thiouridylate)-methyltransferase                         | Clostridium thermocellum ATCC 27405 | Firmicutes          | anaero.       | 40,2 |
| mnmE      | GTP-binding protein involved in biosynthesis of 5-methylaminomethyl-2-thiouridine                   | Cloam0156 | trmE          | tRNA modification GTPase                                                             | Aquifex aeolicus VF5                | Aquificae           | aero.         | 41,5 |
| mnmG      | glucose inhibited division protein A, involved in biosynthesis of 5-methylaminomethyl-2-thiouridine | Cloam1794 | gidA          | glucose inhibited division protein A                                                 | Halothermothrix orenii H 168        | Firmicutes          | anaero.       | 49,7 |
| rnpA      | protein component of ribonuclease P                                                                 | Cloam0546 |               | putative RNase P, protein component, involved in tRNA and 4.5S RNA-processing (RnpA) | Pelobacter carbinolicus DSM 2380    | Deltaproteobacteria | anaero.       | 32,9 |
| pth       | peptidyl-tRNA hydrolase                                                                             | Cloam1611 | pth           | peptidyl-tRNA hydrolase                                                              | Bacillus clausii KSM-K16            | Firmicutes          |               | 42,7 |
| iscS      | cysteine desulfurase-NifS homolog                                                                   | Cloam1691 | iscS          | Cysteine desulfurase (Thil transpersulfidase) (NifS protein homolog)                 | Clostridium beijerincki NCIMB 8052  | Firmicutes          |               | 42,7 |

**1. INFORMATION STORAGE AND PROCESSING****1.2. RNA metabolism****1.2.2. Translation****1.2.2.3. Ribosomal proteins (50 Results ordered by gene name)**

| Gene name | Product                   | Locus_tag | Ref Gene name | Ref Product                                                             | RefSeq CG & WGS Best hit                  | Clade Best hit         | Mode Best hit | %id  |
|-----------|---------------------------|-----------|---------------|-------------------------------------------------------------------------|-------------------------------------------|------------------------|---------------|------|
| rplA      | 50S ribosomal protein L1  | Cloam0459 | rplA          | 50S ribosomal subunit protein L1, regulates synthesis of L1 and L11     | Moorella thermoacetica ATCC 39073         | Firmicutes             | anaero.       | 60,8 |
| rplB      | 50S ribosomal protein L2  | Cloam1137 | rplB          | 50S ribosomal subunit protein L2                                        | Halothermothrix orenii H 168              | Firmicutes             | anaero.       | 68   |
| rplC      | 50S ribosomal protein L3  | Cloam1140 | rplC          | 50S ribosomal subunit protein L3                                        | Croceibacter atlanticus HTCC2559          | Bacteroidetes/Chlorobi | aero.         | 53,3 |
| rplD      | 50S ribosomal protein L4  | Cloam1139 | rplD          | ribosomal protein L4                                                    | Carboxydotherrnus hydrogenoformans Z-2901 | Firmicutes             | anaero.       | 44,3 |
| rplE      | 50S ribosomal protein L5  | Cloam1128 | rplE          | 50S ribosomal subunit protein L5                                        | Geobacter sulfurreducens PCA              | Deltaproteobacteria    | anaero.       | 67,7 |
| rplF      | 50S ribosomal protein L6  | Cloam1125 | rplF          | 50S ribosomal subunit protein L6                                        | Syntrophomonas wolfei str. Goettingen     | Firmicutes             | anaero.       | 52,3 |
| rplI      | 50S ribosomal protein L9  | Cloam1606 | rplI          | ribosomal protein L9                                                    | Syntrophobacter fumaroxidans MPOB         | Deltaproteobacteria    | anaero.       | 42,6 |
| rplJ      | 50S ribosomal protein L10 | Cloam0458 | rplJ          | ribosomal protein L10                                                   | Carboxydotherrnus hydrogenoformans Z-2901 | Firmicutes             | anaero.       | 45,3 |
| rplK      | 50S ribosomal protein L11 | Cloam0460 | rplK          | 50S ribosomal subunit protein L11, N-terminal believed to regulate RelA | Clostridium acetobutylicum ATCC 824       | Firmicutes             | anaero.       | 66,9 |
| rplL      | 50S ribosomal protein L12 | Cloam0457 | rplL          | 50S ribosomal subunit protein L7/L12                                    | Moorella thermoacetica ATCC 39073         | Firmicutes             | anaero.       | 69,4 |
| rplM      | 50S ribosomal protein L13 | Cloam1894 | rplM          | 50S ribosomal subunit protein L13                                       | Desulfitobacterium hafniense Y51          | Firmicutes             | anaero.       | 28,7 |
| rplN      | 50S ribosomal protein L14 | Cloam1130 | rplN          | 50S ribosomal subunit protein L14                                       | Clostridium acetobutylicum ATCC 824       | Firmicutes             | anaero.       | 72,9 |
| rplO      | 50S ribosomal protein L15 | Cloam1121 | rplO          | 50S ribosomal subunit protein L15                                       | Thermoanaerobacter tengcongensis MB4      | Firmicutes             | anaero.       | 50   |
| rplP      | 50S ribosomal protein L16 | Cloam1133 | rplP          | 50S ribosomal subunit protein L16                                       | Syntrophobacter fumaroxidans MPOB         | Deltaproteobacteria    | anaero.       | 70,1 |
| rplQ      | 50S ribosomal protein L17 | Cloam1112 | rplQ          | 50S ribosomal subunit protein L17                                       | Alteromonas macleodii 'Deep ecotype'      | Gammaproteobacteria    | aero.         | 49,2 |
| rplR      | 50S ribosomal protein L18 | Cloam1124 | rplR          | 50S ribosomal subunit protein L18                                       | Thermobifida fusca YX                     | Actinobacteria         | aero.         | 64,9 |
| rplS      | 50S ribosomal protein L19 | Cloam1462 | rplS          | 50S ribosomal subunit protein L19                                       | Bacillus licheniformis ATCC 14580         | Firmicutes             | fac.          | 62,5 |
| rplT      | 50S ribosomal protein L20 | Cloam0531 | rplT          | 50S ribosomal subunit protein L20, also posttranslational autoregulator | Alteromonas macleodii 'Deep ecotype'      | Gammaproteobacteria    | aero.         | 58,3 |
| rplU      | 50S ribosomal protein L21 | Cloam0293 | rplU          | 50S ribosomal subunit protein L21                                       | Bacteroides thetaiotaomicron VPI-5482     | Bacteroidetes/Chlorobi | anaero.       | 47,6 |
| rplV      | 50S ribosomal protein L22 | Cloam1135 | rplV          | 50S ribosomal subunit protein L22                                       | Desulfuromonas acetoxidans DSM 684        | Deltaproteobacteria    | anaero.       | 54,1 |
| rplW      | 50S ribosomal protein L23 | Cloam1138 | rplW          | 50S ribosomal subunit protein L23                                       | Halothermothrix orenii H 168              | Firmicutes             | anaero.       | 59,6 |
| rplX      | 50S ribosomal protein L24 | Cloam1129 | rplX          | ribosomal protein L24                                                   | Desulfitobacterium hafniense DCB-2        | Firmicutes             | anaero.       | 51   |
| rpmA      | 50S ribosomal protein L27 | Cloam0292 | rpmA          | 50S ribosomal subunit protein L27                                       | Deinococcus geothermalis DSM 11300        | Unknown                |               | 63,4 |
| rpmB      | 50S ribosomal protein L28 | Cloam1411 | rpmB          | ribosomal protein L28                                                   | Pelobacter carbinolicus DSM 2380          | Deltaproteobacteria    | anaero.       | 49,2 |
| rpmC      | 50S ribosomal protein L29 | Cloam1132 | rpmC          | ribosomal protein L29                                                   | Thermoanaerobacter tengcongensis MB4      | Firmicutes             | anaero.       | 65,6 |
| rpmE      | 50S ribosomal protein L31 | Cloam0173 | rpmE          | 50S ribosomal subunit protein L31                                       | Geobacter metallireducens GS-15           | Deltaproteobacteria    | anaero.       | 69,7 |
| rpmF      | 50S ribosomal protein L32 | Cloam0257 | rpmF          | ribosomal protein L32                                                   | Geobacter uraniumreducens Rf4             | Deltaproteobacteria    | micro.        | 54,2 |

|      |                           |           |      |                                                      |                                             |                            |         |      |
|------|---------------------------|-----------|------|------------------------------------------------------|---------------------------------------------|----------------------------|---------|------|
| rpmG | 50S ribosomal protein L33 | Cloam0463 | rpmG | ribosomal protein L33                                | Aquifex aeolicus VF5                        | Aquificae                  | aero.   | 71,7 |
| rpmH | 50S ribosomal protein L34 | Cloam0547 | rpmH | 50S ribosomal subunit protein L34                    | Bacteroides fragilis YCH46                  | Bacteroidetes/Chlorobi     | anaero. | 81,8 |
| rpml | 50S ribosomal protein L35 | Cloam0530 | rpml | 50S ribosomal protein L35                            | Desulfotobacterium hafniense Y51            | Firmicutes                 | anaero. | 62,9 |
| rpmJ | 50S ribosomal protein L36 | Cloam1117 | rpmJ | 50S ribosomal subunit protein X                      | Alteromonas macleodii 'Deep ecotype'        | Gammaproteobacteria        | aero.   | 79,5 |
| rpsB | 30S ribosomal protein S2  | Cloam1890 | rpsB | 30S ribosomal subunit protein S2                     | Geobacter metallireducens GS-15             | Deltaproteobacteria        | anaero. | 57,3 |
| rpsC | 30S ribosomal protein S3  | Cloam1134 | rpsC | 30S ribosomal subunit protein S3                     | Pseudomonas syringae pv. tomato str. DC3000 | Gammaproteobacteria        | aero.   | 56,4 |
| rpsD | 30S ribosomal protein S4  | Cloam1114 | rpsD | 30S ribosomal subunit protein S4                     | Desulfuromonas acetoxidans DSM 684          | Deltaproteobacteria        | anaero. | 53,4 |
| rpsE | 30S ribosomal protein S5  | Cloam1123 | rpsE | 30S ribosomal subunit protein S5                     | Moorella thermoacetica ATCC 39073           | Firmicutes                 | anaero. | 61   |
| rpsF | 30S ribosomal protein S6  | Cloam1610 | rpsF | Ribosomal protein S6                                 | Carboxythermus hydrogenoformans Z-2901      | Firmicutes                 | anaero. | 37,6 |
| rpsG | 30S ribosomal protein S7  | Cloam0453 | rpsG | 30S ribosomal subunit protein S7, initiates assembly | Rhodopseudomonas palustris CGA009           | Alphaproteobacteria        | fac.    | 63,5 |
| rpsH | 30S ribosomal protein S8  | Cloam1126 | rpsH | 30S ribosomal subunit protein S8, and regulator      | Chlamydia muridarum Nigg                    | Chlamydiae/Verrucomicrobia |         | 46,7 |
| rpsI | 30S ribosomal protein S9  | Cloam1893 | rpsI | 30S ribosomal subunit protein S9                     | Clostridium perfringens str. 13             | Firmicutes                 | anaero. | 66,1 |
| rpsJ | 30S ribosomal protein S10 | Cloam1141 | rpsJ | 30S ribosomal subunit protein S10                    | Solibacter usitatus Ellin6076               | Acidobacteria              | aero.   | 67,7 |
| rpsK | 30S ribosomal protein S11 | Cloam1115 | rpsK | 30S ribosomal subunit protein S11                    | Halothermothrix orenii H 168                | Firmicutes                 | anaero. | 62,7 |
| rpsL | 30S ribosomal protein S12 | Cloam0454 | rpsL | 30S ribosomal subunit protein S12                    | Polaribacter irgensii 23-P                  | Bacteroidetes/Chlorobi     | aero.   | 80,5 |
| rpsM | 30S ribosomal protein S13 | Cloam1116 | rpsM | 30S ribosomal subunit protein S13                    | Thermoanaerobacter ethanolicus ATCC 33223   | Firmicutes                 | anaero. | 62,7 |
| rpsN | 30S ribosomal protein S14 | Cloam1127 | rpsN | ribosomal protein S14                                | Carboxythermus hydrogenoformans Z-2901      | Firmicutes                 | anaero. | 73,8 |
| rpsO | 30S ribosomal protein S15 | Cloam1474 | rpsO | 30S ribosomal subunit protein S15                    | Halothermothrix orenii H 168                | Firmicutes                 | anaero. | 66,3 |
| rpsP | 30S ribosomal protein S16 | Cloam1467 | rpsP | Ribosomal protein S16                                | Geobacillus kaustophilus HTA426             | Firmicutes                 | aero.   | 60,2 |
| rpsQ | 30S ribosomal protein S17 | Cloam1131 | rpsQ | 30S ribosomal subunit protein S17                    | Carboxythermus hydrogenoformans Z-2901      | Firmicutes                 | anaero. | 67,7 |
| rpsR | 30S ribosomal protein S18 | Cloam1608 | rpsR | 30S ribosomal subunit protein S18                    | Desulfotalea psychrophila LSv54             | Deltaproteobacteria        | anaero. | 61,4 |
| rpsS | 30S ribosomal protein S19 | Cloam1136 | rpsS | 30S ribosomal subunit protein S19                    | Anaeromyxobacter dehalogenans 2CP-C         | Deltaproteobacteria        | anaero. | 75   |
| rpsT | 30S ribosomal protein S20 | Cloam0933 | rpsT | 30S ribosomal protein S20                            | Symbiobacterium thermophilum IAM 14863      | Actinobacteria             | micro.  | 48,5 |

## 1. INFORMATION STORAGE AND PROCESSING

### 1.2. RNA metabolism

#### 1.2.2. Translation

##### 1.2.2.4. Ribosome function, maturation and modification (7 Results ordered by gene name)

| Gene name | Product                       | Locus_tag | Ref Gene name | Ref Product                                                                                                                                                                                                             | RefSeq CG & WGS Best hit                          | Clade Best hit | Mode Best hit | %id |
|-----------|-------------------------------|-----------|---------------|-------------------------------------------------------------------------------------------------------------------------------------------------------------------------------------------------------------------------|---------------------------------------------------|----------------|---------------|-----|
| ksgA      | dimethyladenosine transferase | Cloam1814 | ksgA          | Dimethyladenosine transferase (EC 2.1.1.-) (S-adenosylmethionine-6-N', N'-adenosyl(rRNA) dimethyltransferase) (16S rRNA dimethylase) (High level kasugamycin resistance protein ksgA) (Kasugamycin dimethyltransferase) | Lactobacillus salivarius subsp. salivarius UCC118 | Firmicutes     | fac.          | 43  |

|       |                             |           |      |                                                                    |                                           |                        |         |      |
|-------|-----------------------------|-----------|------|--------------------------------------------------------------------|-------------------------------------------|------------------------|---------|------|
| rbfA  | ribosome-binding factor A   | Cloam0267 |      | putative ribosome-binding factor A (rbfA-like)                     | Halothermothrix orenii H 168              | Firmicutes             | anaero. | 30,6 |
| engA  | GTP-binding protein         | Cloam0371 | engA | GTP-binding protein                                                | Thermoanaerobacter ethanolicus ATCC 33223 | Firmicutes             | anaero. | 49,2 |
| obg   | GTP-binding protein         | Cloam0122 | obg  | GTP-binding protein, GTP1/OBG family                               | Carboxythermus hydrogenoformans Z-2901    | Firmicutes             | anaero. | 51   |
| ychF  | GTP-binding protein         | Cloam0346 |      | putative GTP-binding protein with nucleoside triP hydrolase domain | Syntrophomonas wolfei str. Goettingen     | Firmicutes             | anaero. | 42,6 |
| era   | GTP-binding protein         | Cloam1148 | era  | GTP-binding protein                                                | Bacteroides fragilis NCTC 9343            | Bacteroidetes/Chlorobi | anaero. | 43,1 |
| cspR* | ribosomal methyltransferase | Cloam1178 |      | putative tRNA/rRNA methyltransferase                               | Bdellovibrio bacteriovorus HD100          | Deltaproteobacteria    | aero.   | 33,5 |

## 1. INFORMATION STORAGE AND PROCESSING

### 1.2. RNA metabolism

#### 1.2.2. Translation

##### 1.2.2.5. Translation factors (12 Results ordered by gene name)

| Gene name | Product                                                                | Locus_tag | Ref Gene name | Ref Product                                                                            | RefSeq CG & WGS Best hit                          | Clade Best hit      | Mode Best hit | %id  |
|-----------|------------------------------------------------------------------------|-----------|---------------|----------------------------------------------------------------------------------------|---------------------------------------------------|---------------------|---------------|------|
| efp       | elongation factor P                                                    | Cloam0572 | efp           | translation initiation factor eIF-5A                                                   | Moorella thermoacetica ATCC 39073                 | Firmicutes          | anaero.       | 49,7 |
| fusA      | elongation factor G                                                    | Cloam1619 | fusA          | translation elongation factor G                                                        | Moorella thermoacetica ATCC 39073                 | Firmicutes          | anaero.       | 52,7 |
| frr       | ribosome recycling factor                                              | Cloam1887 | frr           | ribosome releasing factor                                                              | Geobacillus kaustophilus HTA426                   | Firmicutes          | anaero.       | 53,6 |
| hemK      | N5-glutamine methyltransferase, modulation of release factors activity | Cloam1616 | hemK          | modification methylase, HemK family                                                    | Clostridium difficile QCD-32g58                   | Firmicutes          | anaero.       | 40   |
| infA      | initiation factor IF-1                                                 | Cloam1118 | infA          | protein chain initiation factor IF-1                                                   | Rubrobacter xylanophilus DSM 9941                 | Actinobacteria      | aero.         | 82   |
| infB      | initiation factor IF-2                                                 | Cloam0266 | infB          | translation initiation factor IF-2                                                     | Carboxythermus hydrogenoformans Z-2901            | Firmicutes          | anaero.       | 42   |
| infC      | initiation factor IF-3                                                 | Cloam0529 | infC          | protein chain initiation factor IF-3                                                   | Buchnera aphidicola str. Sg (Schizaphis graminum) | Gammaproteobacteria |               | 55,4 |
| lepA      | GTP-binding elongation factor                                          | Cloam0113 | lepA          | GTP-binding elongation factor                                                          | Thermoanaerobacter tengcongensis MB4              | Firmicutes          | anaero.       | 57   |
| prfA      | peptide chain release factor 1 (RF1)                                   | Cloam0175 | prfA          | peptide chain release factor RF-1                                                      | Treponema denticola ATCC 35405                    | Spirochaetes        | anaero.       | 58,9 |
| smpB      | tmRNA-binding protein                                                  | Cloam1778 | smpB          | SsrA-binding protein                                                                   | Thermus thermophilus HB27                         | Deinococcus-Thermus | aero.         | 58   |
| tsf       | elongation factor Ts                                                   | Cloam1889 | tsf           | translation elongation factor Ts                                                       | Thermoanaerobacter ethanolicus ATCC 33223         | Firmicutes          | anaero.       | 57,2 |
| tufA      | elongation factor Tu                                                   | Cloam0464 | tufB          | putative protein chain elongation factor EF-Tu; GTP-binding factor (duplicate of tufA) | Halothermothrix orenii H 168                      | Firmicutes          | anaero.       | 77,1 |

## 1. INFORMATION STORAGE AND PROCESSING

### 1.2. RNA metabolism

#### 1.2.3. RNA degradation (2 Results ordered by gene name)

| Gene name | Product | Locus_tag | Ref Gene name | Ref Product | RefSeq CG & WGS Best hit | Clade Best hit | Mode Best hit | %id |
|-----------|---------|-----------|---------------|-------------|--------------------------|----------------|---------------|-----|
|-----------|---------|-----------|---------------|-------------|--------------------------|----------------|---------------|-----|

|     |                                           |           |     |                                                          |                                                     |               |         |      |
|-----|-------------------------------------------|-----------|-----|----------------------------------------------------------|-----------------------------------------------------|---------------|---------|------|
| pnp | polyribonucleotide nucleotidyltransferase | Cloam1473 | pnp | polynucleotide phosphorylase, has polyadenylase activity | Fusobacterium nucleatum subsp. vincentii ATCC 49256 | Fusobacteria  | anaero. | 53   |
| rnc | ribonuclease III                          | Cloam0250 | rnc | dsRNA-specific ribonuclease                              | Solibacter usitatus Ellin6076                       | Acidobacteria | aero.   | 42,6 |

## 2. PROTEIN PROCESSING, FOLDING, AND SECRETION

### 2.1. Protein post-translational modification (2 Results ordered by gene name)

| Gene name | Product                   | Locus_tag | Ref Gene name | Ref Product                                                                                        | RefSeq CG & WGS Best hit             | Clade Best hit | Mode Best hit | %id  |
|-----------|---------------------------|-----------|---------------|----------------------------------------------------------------------------------------------------|--------------------------------------|----------------|---------------|------|
| map       | methionine aminopeptidase | Cloam1119 | map           | methionine aminopeptidase (MAP) (peptidase M)                                                      | Thermoanaerobacter tengcongensis MB4 | Firmicutes     | anaero.       | 54,6 |
| pepA      | aminopeptidase A/I        | Cloam0131 | pepA          | cytosol aminopeptidase (leucine aminopeptidase) (LAP) (leucyl aminopeptidase) (aminopeptidase A/I) | Clostridium perfringens str. 13      | Firmicutes     | anaero.       | 46,4 |

## 2. PROTEIN PROCESSING, FOLDING, AND SECRETION

### 2.2. Protein folding (5 Results ordered by gene name)

| Gene name | Product                    | Locus_tag | Ref Gene name | Ref Product                                                                        | RefSeq CG & WGS Best hit         | Clade Best hit         | Mode Best hit | %id  |
|-----------|----------------------------|-----------|---------------|------------------------------------------------------------------------------------|----------------------------------|------------------------|---------------|------|
| dnaJ      | Hsp70 co-chaperone         | Cloam0758 | dnaJ          | Chaperone protein DnaJ (Heat shock protein 40) (HSP40)                             | Pelodictyon luteolum DSM 273     | Bacteroidetes/Chlorobi | anaero.       | 47,1 |
| dnaK      | chaperone Hsp70            | Cloam0757 | dnaK          | Chaperone protein dnaK (Heat shock protein 70) (Heat shock 70 kDa protein) (HSP70) | Borrelia burgdorferi B31         | Spirochaetes           | aero.         | 63,4 |
| groEL     | class I heat-shock protein | Cloam1649 | groL          | chaperone Hsp60 (GroEL), part of GroE chaperone system                             | Syntrophus aciditrophicus SB     | Deltaproteobacteria    | anaero.       | 64,7 |
| groES     | class I heat-shock protein | Cloam0817 | groES         | chaperonin, 10 kDa                                                                 | Porphyromonas gingivalis W83     | Bacteroidetes/Chlorobi | anaero.       | 58,9 |
| grpE      | Hsp70 co-chaperone         | Cloam0756 | grpE          | GrpE protein                                                                       | Chloroflexus aurantiacus J-10-fl | Chloroflexi            | anaero.       | 37,8 |

## 2. PROTEIN PROCESSING, FOLDING, AND SECRETION

### 2.3. Protein translocation and secretion (5 Results ordered by gene name)

| Gene name | Product                                                | Locus_tag | Ref Gene name | Ref Product                                                                                   | RefSeq CG & WGS Best hit                  | Clade Best hit         | Mode Best hit | %id  |
|-----------|--------------------------------------------------------|-----------|---------------|-----------------------------------------------------------------------------------------------|-------------------------------------------|------------------------|---------------|------|
| ffh       | protein component of signal recognition particle (SRP) | Cloam1602 | ffh           | 4.5S-RNP protein, GTP-binding export factor, part of signal recognition particle with 4.5 RNA | Carboxydotherrmus hydrogenoformans Z-2901 | Firmicutes             | anaero.       | 56,9 |
| ftsY      | signal recognition particle receptor                   | Cloam0799 | ftsY          | Cell division protein FtsY                                                                    | Porphyromonas gingivalis W83              | Bacteroidetes/Chlorobi | anaero.       | 48,2 |
| secA      | preprotein translocase subunit (ATPase)                | Cloam1732 | secA          | preprotein translocase secA subunit, essential ATPase protein                                 | Chlorobium tepidum TLS                    | Bacteroidetes/Chlorobi | anaero.       | 48,8 |

|      |                                                 |           |      |                                                                 |                                      |                     |         |      |
|------|-------------------------------------------------|-----------|------|-----------------------------------------------------------------|--------------------------------------|---------------------|---------|------|
| secE | membrane-embeded preprotein translocase subunit | Cloam0462 | secE | Preprotein translocase subunit SecE                             | Listeria monocytogenes str. 4b F2365 | Firmicutes          | fac.    | 47,3 |
| secY | membrane-embeded preprotein translocase subunit | Cloam1120 | secY | preprotein translocase secY subunit, essential membrane protein | Syntrophobacter fumaroxidans MPOB    | Deltaproteobacteria | anaero. | 52   |

## 2. PROTEIN PROCESSING, FOLDING, AND SECRETION

### 2.4. Protein turnover (3 Results ordered by gene name)

| Gene name | Product                                    | Locus_tag | Ref Gene name | Ref Product                                                 | RefSeq CG & WGS Best hit        | Clade Best hit      | Mode Best hit | %id  |
|-----------|--------------------------------------------|-----------|---------------|-------------------------------------------------------------|---------------------------------|---------------------|---------------|------|
| gcp       | probable O-sialoglycoprotein endopeptidase | Cloam0874 |               | putative metalloendopeptidase, glycoprotease family         | Clostridium perfringens str. 13 | Firmicutes          | anaero.       | 48,3 |
| hflB      | ATP-dependent protease                     | Cloam0831 | ftsH          | Cell division protein FtsH, ATP-dependent zinc protease     | Geobacter sulfurreducens PCA    | Deltaproteobacteria | anaero.       | 57,3 |
| lon       | ATP-dependent protease La                  | Cloam1447 | lon           | DNA-binding ATP-dependent protease La; heat shock K-protein | Geobacter uraniumreducens Rf4   | Deltaproteobacteria | micro.        | 49,1 |

## 3. CELLULAR PROCESSES

### 3.1. Cell division (1 Results ordered by gene name)

| Gene name | Product                            | Locus_tag | Ref Gene name | Ref Product                                                             | RefSeq CG & WGS Best hit     | Clade Best hit      | Mode Best hit | %id  |
|-----------|------------------------------------|-----------|---------------|-------------------------------------------------------------------------|------------------------------|---------------------|---------------|------|
| ftsZ      | cytoskeletal cell division protein | Cloam0778 | ftsZ          | Cell division protein FtsZ, tubulin-like GTP-binding protein and GTPase | Syntrophus aciditrophicus SB | Deltaproteobacteria | anaero.       | 51,7 |

## 3. CELLULAR PROCESSES

### 3.2. Transport (4 Results ordered by gene name)

| Gene name | Product                                                                            | Locus_tag | Ref Gene name | Ref Product                                                                     | RefSeq CG & WGS Best hit             | Clade Best hit      | Mode Best hit | %id  |
|-----------|------------------------------------------------------------------------------------|-----------|---------------|---------------------------------------------------------------------------------|--------------------------------------|---------------------|---------------|------|
| pitA*     | low-affinity inorganic phosphate transporter                                       | Cloam0136 |               | putative low-affinity inorganic phosphate transporter (pitA-like)               | Synechococcus sp. WH 5701            | Cyanobacteria       |               | 44,4 |
| ptsG      | phosphotransferase system (PTS) glucose-specific enzyme II                         | -         |               |                                                                                 |                                      |                     |               |      |
| ptsH      | histidine-containing phosphocarrier protein of the phosphotransferase system (PTS) | Cloam1753 | ptsH          | phosphocarrier protein HPr                                                      | Geobacter sulfurreducens PCA         | Deltaproteobacteria | anaero.       | 58   |
| ptsI      | phosphotransferase system (PTS) enzyme I                                           | Cloam1752 |               | putative PTS family enzyme I and Hpr components, PEP-protein phosphotransferase | Thermoanaerobacter tengcongensis MB4 | Firmicutes          | anaero.       | 39,8 |



|  |  |           |  |                                                                      |                                      |            |         |      |
|--|--|-----------|--|----------------------------------------------------------------------|--------------------------------------|------------|---------|------|
|  |  | Cloam0618 |  | putative Sugar phosphotransferase system IIA component (EC 2.7.1.69) | Thermoanaerobacter tengcongensis MB4 | Firmicutes | anaero. | 40,8 |
|--|--|-----------|--|----------------------------------------------------------------------|--------------------------------------|------------|---------|------|

#### 4. ENERGETIC AND INTERMEDIARY METABOLISM

##### 4.1. Glycolysis (10 Results ordered by gene name)

| Gene name | Product                                  | Locus_tag | Ref Gene name | Ref Product                                                                                                         | RefSeq CG & WGS Best hit             | Clade Best hit             | Mode Best hit | %id  |
|-----------|------------------------------------------|-----------|---------------|---------------------------------------------------------------------------------------------------------------------|--------------------------------------|----------------------------|---------------|------|
| eno       | enolase                                  | Cloam1651 | eno           | enolase (2-phosphoglycerate dehydratase) (2-phospho-D-glycerate hydro-lyase)                                        | Thermoanaerobacter tengcongensis MB4 | Firmicutes                 | anaero.       | 66,6 |
| fbaA      | fructose-1,6-bisphosphate aldolase       | Cloam1837 | fbaA          | fructose-bisphosphate aldolase                                                                                      | Halothermothrix orenii H 168         | Firmicutes                 | anaero.       | 32,9 |
| gapA      | glyceraldehyde 3-phosphate dehydrogenase | Cloam1840 | gapA          | Glyceraldehyde-3-phosphate dehydrogenase (GAPDH)                                                                    | Thermotoga maritima MSB8             | Thermotogae                | anaero.       | 67,1 |
| gpmA      | phosphoglycerate mutase                  | Cloam0341 | gpmA          | 2,3-bisphosphoglycerate-dependent phosphoglycerate mutase (Phosphoglyceromutase) (PGAM) (BPG-dependent PGAM) (dPGM) | Thermoanaerobacter tengcongensis MB4 | Firmicutes                 | anaero.       | 67,3 |
| ldh       | L-lactate dehydrogenase                  | _         |               |                                                                                                                     |                                      |                            |               |      |
| pfkA      | 6-phosphofructokinase                    | Cloam0626 | pfk           | 6-phosphofructokinase (ATP-dependent phosphofructokinase) (ATP-PFK)                                                 | Geobacter sulfurreducens PCA         | Deltaproteobacteria        | anaero.       | 48,5 |
| pgi       | glucose-6-phosphate isomerase            | Cloam1751 | pgi           | Glucose-6-phosphate isomerase (GPI) (Phosphoglucose isomerase) (PGI) (Phosphohexose isomerase) (PHI)                | Halothermothrix orenii H 168         | Firmicutes                 | anaero.       | 47,3 |
| pgk       | phosphoglycerate kinase                  | Cloam0802 | pgk           | 3-phosphoglycerate kinase                                                                                           | Chlamydia trachomatis D/UW-3/CX      | Chlamydiae/Verrucomicrobia |               | 33,6 |
| pykA*     | pyruvate kinase                          | Cloam0519 | ppdK          | pyruvate phosphate dikinase                                                                                         | Bacteroides fragilis NCTC 9343       | Bacteroidetes/Chlorobi     | anaero.       | 72,9 |
| tpiA      | triose phosphate isomerase               | Cloam1668 | tpiA          | Triosephosphate isomerase (TIM) (Triose-phosphate isomerase)                                                        | Tenacibaculum sp. MED152             | Bacteroidetes/Chlorobi     | aero.         | 47,2 |
|           |                                          | Cloam1211 | pfp           | Pyrophosphate--fructose 6-phosphate 1-phosphotransferase (PPi-PFK) - anaero.                                        | Rhodospirillum rubrum ATCC 11170     | Alphaproteobacteria        | fac.          | 70,8 |

#### 4. ENERGETIC AND INTERMEDIARY METABOLISM

##### 4.2. Proton-motive force generation (9 Results ordered by gene name)

| Gene name | Product              | Locus_tag | Ref Gene name | Ref Product                                                                | RefSeq CG & WGS Best hit     | Clade Best hit         | Mode Best hit | %id  |
|-----------|----------------------|-----------|---------------|----------------------------------------------------------------------------|------------------------------|------------------------|---------------|------|
| atpA      | ATP synthase chain   | Cloam1053 |               | V-type ATP synthase beta chain 1 (EC 3.6.3.14) (V-type ATPase subunit B 1) | Porphyromonas gingivalis W83 | Bacteroidetes/Chlorobi | anaero.       | 80,9 |
| atpB      | ATP synthase A chain | _         |               |                                                                            |                              |                        |               |      |
| atpC      | ATP synthase chain   | _         |               |                                                                            |                              |                        |               |      |

|      |                                                              |           |  |                                                                             |                               |                        |         |      |
|------|--------------------------------------------------------------|-----------|--|-----------------------------------------------------------------------------|-------------------------------|------------------------|---------|------|
| atpD | ATP synthase chain                                           | Cloam1052 |  | V-type ATP synthase alpha chain 1 (EC 3.6.3.14) (V-type ATPase subunit A 1) | Bacteroides fragilis YCH46    | Bacteroidetes/Chlorobi | anaero. | 68,8 |
| atpE | ATP synthase C chain                                         | Cloam1056 |  | putative V(Vacuolar)-type Na <sup>+</sup> -ATP synthase subunit K           | Bacteroides fragilis YCH46    | Bacteroidetes/Chlorobi | anaero. | 54,4 |
| atpF | ATP synthase B chain                                         | Cloam1050 |  | putative V-type ATPase, subunit E                                           | Porphyromonas gingivalis W83  | Bacteroidetes/Chlorobi | anaero. | 36,7 |
| atpG | ATP synthase chain                                           | –         |  |                                                                             |                               |                        |         |      |
| atpH | ATP synthase chain                                           | –         |  |                                                                             |                               |                        |         |      |
| yidC | essential for proper integration of ATPase into the membrane | Cloam0544 |  | hypothetical protein; putative membrane protein                             | Syntrophus aciditrophicus SB  | Deltaproteobacteria    | anaero. | 27,9 |
|      |                                                              | Cloam1054 |  | putative V(Vacuolar)-type ATP synthase subunit D                            | Bacteroides fragilis YCH46    | Bacteroidetes/Chlorobi | anaero. | 54,6 |
|      |                                                              | Cloam1055 |  | putative V(Vacuolar)-type Na <sup>+</sup> ATP synthase subunit I            | Bacteroides fragilis NCTC 934 | Bacteroidetes/Chlorobi | anaero. | 36,9 |

#### 4. ENERGETIC AND INTERMEDIARY METABOLISM

##### 4.3. Pentose phosphate pathway (3 Results ordered by gene name)

| Gene name | Product                        | Locus_tag | Ref Gene name | Ref Product                                                               | RefSeq CG & WGS Best hit               | Clade Best hit        | Mode Best hit | %id  |
|-----------|--------------------------------|-----------|---------------|---------------------------------------------------------------------------|----------------------------------------|-----------------------|---------------|------|
| rpe       | ribulose-phosphate 3-epimerase | Cloam1603 | rpe           | D-ribulose-5-phosphate 3-epimerase                                        | Campylobacter fetus subsp. fetus 82-40 | Epsilonproteobacteria | micro.        | 47,6 |
| rpiA      | ribose 5-phosphate isomerase   | Cloam0751 | rpiB          | ribose 5-phosphate isomerase B, also acts as allose 6-phosphate isomerase | Syntrophus aciditrophicus SB           | Deltaproteobacteria   | anaero.       | 55,6 |
| tkk       | transketolase                  | Cloam1259 |               | putative Transketolase                                                    | Thermotoga maritima MSB8               | Thermotogae           | anaero.       | 45,8 |

#### 4. ENERGETIC AND INTERMEDIARY METABOLISM

##### 4.4. Lipid metabolism (7 Results ordered by gene name)

| Gene name | Product                                 | Locus_tag | Ref Gene name | Ref Product                                                                                                                                                                                                         | RefSeq CG & WGS Best hit           | Clade Best hit      | Mode Best hit | %id  |
|-----------|-----------------------------------------|-----------|---------------|---------------------------------------------------------------------------------------------------------------------------------------------------------------------------------------------------------------------|------------------------------------|---------------------|---------------|------|
| cdsA      | phosphatidate cytidyltransferase        | Cloam1573 | cdsA          | Phosphatidate cytidyltransferase (CDP-diglyceride synthetase) (CDP-diglyceride pyrophosphorylase) (CDP-diacylglycerol synthase) (CDS) (CTP:phosphatidate cytidyltransferase) (CDP-DAG synthase) (CDP-DG synthetase) | Vibrio vulnificus CMCP6 chromosome | Gammaproteobacteria | fac.          | 31,5 |
| fadD      | acyl-CoA synthase                       | –         |               |                                                                                                                                                                                                                     |                                    |                     |               |      |
| gpsA      | sn-glycerol-3-phosphate dehydrogenase   | Cloam0870 | gpsA          | glycerol-3-phosphate dehydrogenase [NAD(P)+] (NAD(P)H- dependent glycerol-3-phosphate dehydrogenase)                                                                                                                | Geobacter uraniumreducens Rf4      | Deltaproteobacteria | micro.        | 49,3 |
| plsB      | sn-glycerol-3-phosphate acyltransferase | –         |               |                                                                                                                                                                                                                     |                                    |                     |               |      |

|      |                                                |           |      |                                                                                                                                                  |                                                     |                        |         |      |
|------|------------------------------------------------|-----------|------|--------------------------------------------------------------------------------------------------------------------------------------------------|-----------------------------------------------------|------------------------|---------|------|
| plsC | 1-acyl-sn-glycerol-3-phosphate acyltransferase | Cloam1445 |      | putative 1-acyl-sn-glycerol-3-phosphate acyltransferase (1-AGP acyltransferase) (1-AGPAT) (Lysophosphatidic acid acyltransferase) (LPAAT) (plsC) | Clostridium acetobutylicum ATCC 824                 | Firmicutes             | anaero. | 36,2 |
| psd  | phosphatidylserine decarboxylase               | -         |      |                                                                                                                                                  |                                                     |                        |         |      |
| pssA | phosphatidylserine synthase                    | -         |      |                                                                                                                                                  |                                                     |                        |         |      |
|      |                                                | Cloam0330 | pgsA | CDP-diacylglycerol-glycerol-3-phosphate 3-phosphatidyltransferase (Phosphatidylglycerophosphate synthase) (PGP synthase)                         | Clostridium difficile QCD-32g58                     | Firmicutes             | anaero. | 46   |
|      |                                                | Cloam0597 | cls  | cardiolipin synthetase 2 (Cardiolipin synthase 2) (CL synthase 2)                                                                                | Bacillus anthracis str. Ames                        | Firmicutes             | fac.    | 43,3 |
|      |                                                | Cloam0005 | pgpA | phosphatidylglycerophosphatase A                                                                                                                 | Prosthecochloris aestuarii DSM 271                  | Bacteroidetes/Chlorobi |         | 40   |
|      |                                                | Cloam0256 | plsX | fatty acid/phospholipid synthesis protein, methyltransferase domain                                                                              | Fusobacterium nucleatum subsp. vincentii ATCC 49256 | Fusobacteria           | anaero. | 47,3 |
|      |                                                | Cloam1600 |      | putative acyl-CoA synthetase with NAD(P)-binding domain and succinyl-CoA synthetase domain                                                       | Moorella thermoacetica ATCC 39073                   | Firmicutes             | anaero. | 42,4 |

#### 4. ENERGETIC AND INTERMEDIARY METABOLISM

##### 4.5. Biosynthesis of nucleotides (15 Results ordered by gene name)

| Gene name | Product                                              | Locus_tag | Ref Gene name | Ref Product                                                                                                                                                           | RefSeq CG & WGS Best hit               | Clade Best hit         | Mode Best hit | %id  |
|-----------|------------------------------------------------------|-----------|---------------|-----------------------------------------------------------------------------------------------------------------------------------------------------------------------|----------------------------------------|------------------------|---------------|------|
| adk       | adenylate kinase                                     | Cloam1458 | adk           | Adenylate kinase (ATP-AMP transphosphorylase)                                                                                                                         | Frankia sp. EAN1pec                    | Actinobacteria         | aero.         | 43,5 |
| dcd       | dCTP deaminase                                       | -         |               |                                                                                                                                                                       |                                        |                        |               |      |
| gmk       | guanylate kinase                                     | Cloam0289 | gmk           | Guanylate kinase (GMP kinase)                                                                                                                                         | Clostridium beijerincki NCIMB 8052     | Firmicutes             |               | 45   |
| hpt       | hypoxanthine phosphoribosyltransferase               | Cloam0832 | hpt           | Hypoxanthine-guanine phosphoribosyltransferase                                                                                                                        | Thermoanaerobacter tengcongensis MB4   | Firmicutes             | anaero.       | 54,9 |
| ndk       | nucleoside diphosphate kinase                        | Cloam0822 | ndk           | nucleoside diphosphate kinase (NDK) (NDP kinase) (nucleoside-2-P kinase)                                                                                              | Methanocaldococcus jannaschii DSM 2661 | Euryarchaeota          | anaero.       | 43,7 |
| nrdE      | ribonucleoside-diphosphate reductase (major subunit) | Cloam0913 |               | putative B12-dependent ribonucleoside diphosphate (1.17.4.1)/triphosphate(1.17.4.2) reductase (nrdJ-like)                                                             | Thermoanaerobacter tengcongensis MB4   | Firmicutes             | anaero.       | 55   |
| nrdF      | ribonucleoside-diphosphate reductase (minor subunit) | -         |               |                                                                                                                                                                       |                                        |                        |               |      |
| ppa*      | inorganic pyrophosphatase                            | Cloam1022 | hppA          | Pyrophosphate-energized proton pump (Pyrophosphate-energized inorganic pyrophosphatase) (H <sup>+</sup> -PPase) (Membrane-bound proton-translocating pyrophosphatase) | Bacteroides fragilis YCH46             | Bacteroidetes/Chlorobi | anaero.       | 58,1 |

|       |                                      |           |      |                                                                                                                             |                                               |                     |         |      |
|-------|--------------------------------------|-----------|------|-----------------------------------------------------------------------------------------------------------------------------|-----------------------------------------------|---------------------|---------|------|
| prsA  | phosphoribosylpyrophosphate synthase | Cloam1613 | prsA | ribose-phosphate pyrophosphokinase (RPPK) (phosphoribosyl pyrophosphate synthetase) (P-Rib-PP synthetase) (PRPP synthetase) | Geobacter sulfurreducens PCA                  | Deltaproteobacteria | anaero. | 55   |
| pyrG  | CTP synthase                         | Cloam0808 | pyrG | CTP synthase (UTP-ammonia ligase) (CTP synthetase)                                                                          | Caldicellulosiruptor saccharolyticus DSM 8903 | Firmicutes          | anaero. | 59,8 |
| thyA* | thymidylate synthase                 | Cloam1244 |      | putative Thymidylate synthase (FAD) (thyX)                                                                                  | Syntrophus aciditrophicus SB                  | Deltaproteobacteria | anaero. | 37,7 |
| tmk   | thymidylate kinase                   | Cloam0356 | tmk  | thymidylate kinase                                                                                                          | Carboxydotherrmus hydrogenoformans Z-2901     | Firmicutes          | anaero. | 51,7 |
| trxA  | thioredoxin                          | Cloam0816 | trx  | thioredoxin                                                                                                                 | Desulfotomaculum reducens MI-1                | Firmicutes          | anaero. | 53,4 |
| trxB  | thioredoxin reductase                | Cloam1697 | trxB | Thioredoxin reductase                                                                                                       | Carboxydotherrmus hydrogenoformans Z-2901     | Firmicutes          | anaero. | 53,2 |
| upp*  | uracil phosphoribosyltransferase     | Cloam1719 | pyrR | Bifunctional protein: pyrimidine operon regulatory protein; Uracil phosphoribosyltransferase (UPRTase)                      | Carboxydotherrmus hydrogenoformans Z-2901     | Firmicutes          | anaero. | 63,1 |
|       |                                      | Cloam1514 | cdd  | Cytidine deaminase (3.5.4.5)                                                                                                | Halothermothrix orenii H 168                  | Firmicutes          | anaero. | 53,2 |
|       |                                      | Cloam1777 | ssnA | Cytosine deaminase and related metal-dependent hydrolases (3.5.4.3)                                                         | Syntrophobacter fumaroxidans MPOB             | Deltaproteobacteria | anaero. | 41   |
|       |                                      | Cloam1253 | nrdD | Anaero. ribonucleoside-triphosphate reductase (Oxygen-sensitive ribonucleoside-triphosphate reductase)                      | Syntrophus aciditrophicus SB                  | Deltaproteobacteria | anaero. | 65,3 |
|       |                                      | Cloam1254 |      | putative anaero. ribonucleotide reductase activating enzyme (NrdG-like)                                                     | Syntrophus aciditrophicus SB                  | Deltaproteobacteria | anaero. | 49,5 |

#### 4. ENERGETIC AND INTERMEDIARY METABOLISM

##### 4.6. Biosynthesis of cofactors (12 Results ordered by gene name)

| Gene name | Product                                                                              | Locus_tag | Ref Gene name | Ref Product                                                                                                                                                                                                                                                                    | RefSeq CG & WGS Best hit                            | Clade Best hit      | Mode Best hit | %id  |
|-----------|--------------------------------------------------------------------------------------|-----------|---------------|--------------------------------------------------------------------------------------------------------------------------------------------------------------------------------------------------------------------------------------------------------------------------------|-----------------------------------------------------|---------------------|---------------|------|
| coaA*     | pantothenate kinase                                                                  | Cloam1150 |               | putative Pantothenate kinase type III (PanK, CoaX)                                                                                                                                                                                                                             | Syntrophus aciditrophicus SB                        | Deltaproteobacteria | anaero.       | 36,6 |
| coaD      | 4'-phospho-pantetheine adenyltransferase                                             | Cloam1088 | coaD          | Phosphopantetheine adenyltransferase (Pantetheine- phosphate adenyltransferase) (PPAT) (Dephospho-CoA pyrophosphorylase)                                                                                                                                                       | Bacillus halodurans C-125                           | Firmicutes          | fac.          | 51,9 |
| coaE      | dephosphocoenzyme A kinase                                                           | Cloam0986 | coaE          | Dephospho-CoA kinase (Dephosphocoenzyme A kinase)                                                                                                                                                                                                                              | Fusobacterium nucleatum subsp. nucleatum ATCC 25586 | Fusobacteria        | anaero.       | 32,7 |
| dfp       | phosphopantothenate cysteine ligase, 4'-phospho-pantothenyl-L-cysteine decarboxylase | Cloam1437 | dfp           | Coenzyme A biosynthesis bifunctional protein coaBC (DNA/pantothenate metabolism flavoprotein) [Includes: Phosphopantothenoylcysteine decarboxylase (PPCDC) (CoaC); Phosphopantothenate--cysteine ligase (Phosphopantothenoylcysteine synthase) (PPC synthetase) (PPCS) (CoaB)] | Desulfotomaculum reducens MI-1                      | Firmicutes          | anaero.       | 44,9 |
| folA      | dihydrofolate reductase                                                              | Cloam1093 | folA          | Dihydrofolate reductase                                                                                                                                                                                                                                                        | Bacillus sp. NRRL B-14911                           | Firmicutes          |               | 45,5 |
| glyA      | glycine hydroxymethyltransferase                                                     | Cloam0752 | glyA          | serine hydroxymethyltransferase (serine methylase) (SHMT)                                                                                                                                                                                                                      | Geobacter sulfurreducens PCA                        | Deltaproteobacteria | anaero.       | 62,9 |

|       |                                            |           |      |                                                                                                                                                                |                                     |                     |         |      |
|-------|--------------------------------------------|-----------|------|----------------------------------------------------------------------------------------------------------------------------------------------------------------|-------------------------------------|---------------------|---------|------|
| metK  | methionine adenosyltransferase             | Cloam1766 | metK | S-adenosylmethionine synthetase (Methionine adenosyltransferase) (AdoMet synthetase) (MAT)                                                                     | Nitrosomonas eutropha C71           | Betaproteobacteria  |         | 51,6 |
| nadR  | adenyl transferase                         | -         |      |                                                                                                                                                                |                                     |                     |         |      |
| nadV  | nicotinamide phosphoribosyltransferase     | -         |      |                                                                                                                                                                |                                     |                     |         |      |
| pdxY* | pyridoxal kinase                           | Cloam0285 | pdxK | pyridoxine kinase (Pyridoxal kinase) (Vitamin B6 kinase) (Pyridoxamine kinase) (PN/PL/PM kinase)                                                               | Clostridium acetobutylicum ATCC 824 | Firmicutes          | anaero. | 39,6 |
| ribF  | riboflavin kinase, FMN adenylyltransferase | Cloam0270 | ribF | Riboflavin biosynthesis protein [Includes: Riboflavin kinase (Flavokinase); FMN adenylyltransferase (FAD pyrophosphorylase) (FAD synthetase)]                  | Bdellovibrio bacteriovorus HD100    | Deltaproteobacteria | aero.   | 39,4 |
| yloS  | thiamine pyrophosphokinase                 | Cloam0118 |      | putative Thiamine pyrophosphokinase (TPK) (Thiamine diphosphokinase) (thiN-like)                                                                               | Clostridium thermocellum ATCC 27405 | Firmicutes          | anaero. | 34,7 |
|       |                                            | Cloam1821 | nadE | NH(3)-dependent NAD(+) synthetase (6.3.1.5)                                                                                                                    | Geobacter sulfurreducens PCA        | Deltaproteobacteria | anaero. | 56   |
|       |                                            | Cloam0053 |      | putative nicotinate (nicotinamide) nucleotide adenylyltransferase (nadD)                                                                                       | Clostridium tetani E88              | Firmicutes          | anaero. | 33,3 |
|       |                                            | Cloam1857 | nadC | Nicotinate-nucleotide pyrophosphorylase (EC 2.4.2.19)                                                                                                          | Halothermothrix orenii H 168        | Firmicutes          | anaero. | 52   |
|       |                                            | Cloam0328 | nadA | quinolinate synthetase complex, subunit A (6.3.1.5)                                                                                                            | Clostridium thermocellum ATCC 27405 | Firmicutes          | anaero. | 53   |
|       |                                            | Cloam0357 | nadB | Best similarity : L-aspartate oxidase (EC 1.4.3.16) (LASPO) (Quinolinate synthetase B) Annotation : putative NADH-dependent fumarate reductase (1.3.1.6) (frd) | Geobacter sulfurreducens PCA        | Deltaproteobacteria | anaero. | 49,1 |

## 5. POORLY CHARACTERIZED (7 Results ordered by gene name)

| Gene name | Product                                 | Locus_tag | Ref Gene name | Ref Product                                       | RefSeq CG & WGS Best hit                                 | Clade Best hit | Mode Best hit | %id  |
|-----------|-----------------------------------------|-----------|---------------|---------------------------------------------------|----------------------------------------------------------|----------------|---------------|------|
| mesJ      | conserved hypothetical protein          | Cloam0833 |               | putative tRNA(Ile)-lysidine synthase (mesJ-like)  | Thermoanaerobacter tengcongensis MB4                     | Firmicutes     | anaero.       | 32,5 |
| mraW      | methyltransferase                       | Cloam0789 | mraW          | S-adenosyl-methyltransferase MraW                 | Thermoanaerobacter tengcongensis MB4                     | Firmicutes     | anaero.       | 48,9 |
| ybeY      | conserved hypothetical protein          | Cloam1232 |               | hypothetical protein                              | Exiguobacterium sibiricum 255-15                         | Firmicutes     | fac.          | 32,6 |
| ycfF      | HIT family                              | Cloam0303 |               | HIT family hydrolase                              | Halothermothrix orenii H 168                             | Firmicutes     | anaero.       | 45,4 |
| ycfH      | putative deoxyribonuclease, tatD family | Cloam1263 | tatD          | Mg-dependent DNase                                | Clostridium thermocellum ATCC 27405                      | Firmicutes     | anaero.       | 43,5 |
| yoaE      | conserved hypothetical protein          | Cloam1233 |               | putative Hemolysin-related protein                | Thermotoga maritima MSB8                                 | Thermotogae    | anaero.       | 36,8 |
| yqgF      | conserved hypothetical protein          | Cloam1509 |               | putative Holliday junction resolvase (EC 3.1.-.-) | Crocospaera watsonii WH 8501 (Synechocystis sp. WH 8501) | Cyanobacteria  |               | 36,7 |

|      |                                |           |                              |                                      |            |         |      |
|------|--------------------------------|-----------|------------------------------|--------------------------------------|------------|---------|------|
| yraL | conserved hypothetical protein | Cloam0961 | predicted methyltransferases | Thermoanaerobacter tengcongensis MB4 | Firmicutes | anaero. | 41,7 |
|------|--------------------------------|-----------|------------------------------|--------------------------------------|------------|---------|------|

### Supplementary Table 3 : Essential gene set identification

<sup>a</sup> gene name as in the available *C. acidaminovorans* annotation.

<sup>b</sup> gene product as in the available *C. acidaminovorans* annotation.

<sup>c</sup> Cloam naming reference.

<sup>d</sup> gene name as in the RefSeq best hit corresponding entry.

<sup>e</sup> gene product as in the RefSeq best hit corresponding entry.

<sup>f</sup> RefSeq best hit (in Complete Genomes of in Whole Genome Shotgun sections).

<sup>g</sup> RefSeq best hit clade.

<sup>h</sup> RefSeq mode ( aero. = aerobic, anaero. = anaerobic, fac. = facultative aerobic, micro. = microaerophilic)

<sup>i</sup> percentage identity

Lines highlighted in yellow indicates *C. acidaminovorans* genes that might supplement absent essential genes.

Lines highlighted in orange indicates essential genes not identified in the *C. acidaminovorans* genome annotation.

The essential gene set used is as previously reported (13).
