# Supplementary material
Source: PubMed Central journal article supplement (PMC2293186)
Supplement: jbacter_190_7_2572__5.pdf [file jbacter_190_7_2572__5.pdf]

| <b>Label</b> | <b>Gene</b> | <b>Product</b>                                                                                                                                                                                                                                                                        | <b>Pelobacter carbinolicus DSM 2380 [NC_007498]</b> | <b>Syntrophus aciditrophicus SB [NC_007759]</b> | <b>Syntrophobacter fumaroxidans MPOB [NC_008554]</b> | <b>Pelobacter propionicus DSM 2379 [NZ_AAJH]</b> | <b>Syntrophomonas wolfei subsp. wolfei str. Goettingen [NC_008346]</b> | <b>Candidatus Kuenenia stuttgartiensis</b> | <b>Thermoanaerobacter tengcongensis MB4 [NC_003869]</b> |
|--------------|-------------|---------------------------------------------------------------------------------------------------------------------------------------------------------------------------------------------------------------------------------------------------------------------------------------|-----------------------------------------------------|-------------------------------------------------|------------------------------------------------------|--------------------------------------------------|------------------------------------------------------------------------|--------------------------------------------|---------------------------------------------------------|
| Cloam0005    | pgpA        | phosphatidylglycerophosphatase A                                                                                                                                                                                                                                                      | PCAR_2402                                           | SYN_02031                                       | SFUM_2321                                            |                                                  |                                                                        | kuste2265                                  |                                                         |
| Cloam0007    | def-        | polypeptide deformylase                                                                                                                                                                                                                                                               | PCAR_0245<br>PCAR_2534                              |                                                 | SFUM_0147                                            | PproDRAFT_3526<br>PproDRAFT_2115                 | SWOL_1232                                                              | kuste3758                                  | TTE1507                                                 |
| Cloam0022    | _           | putative tartrate dehydratase alpha subunit (ttdA)/Fumarate hydratase class I, alpha chain (N-terminal)                                                                                                                                                                               |                                                     | SYN_00159                                       |                                                      | PproDRAFT_1500                                   |                                                                        | kuste3110                                  | TTE0075                                                 |
| Cloam0023    | _           | putative tartrate dehydratase beta subunit (ttdB)/fumarate hydratase class I, beta chain (C-terminal)                                                                                                                                                                                 |                                                     | SYN_00158                                       | SFUM_2336                                            | PproDRAFT_1500                                   | SWOL_1628                                                              | kuste3111                                  | TTE0076                                                 |
| Cloam0112    | _           | putative Molecular chaperone (small heat shock protein)                                                                                                                                                                                                                               | PCAR_0369                                           | SYN_00029                                       | SFUM_1742<br>SFUM_2860                               |                                                  |                                                                        |                                            | TTE2578                                                 |
| Cloam0177    | ftcd        | Formimidoyltransferase-cyclodeaminase (Formiminotransferase-cyclodeaminase) (FTCD) [Includes: Glutamate formimidoyltransferase (Glutamate formiminotransferase) (Glutamate formyltransferase); Formimidoyltetrahydrofolate cyclodeaminase (Formiminotetrahydrofolate cyclodeaminase)] |                                                     | SYN_00461 (N-term)                              |                                                      |                                                  |                                                                        | kustc0382 (N-term)                         | TTE0450<br>TTE0456                                      |
| Cloam0281    | dapB        | dihydrodipicolinate reductase (DHPR)                                                                                                                                                                                                                                                  | PCAR_2422                                           |                                                 |                                                      |                                                  |                                                                        | kustc0999                                  | TTE0831                                                 |
| Cloam0287    | ung         | Uracil-DNA glycosylase                                                                                                                                                                                                                                                                | PCAR_2009                                           | SYN_02178                                       | SFUM_1040                                            | PproDRAFT_1979                                   | SWOL_1870                                                              | kustc0725                                  | TTE0077                                                 |
| Cloam0295    | korC        | 2-oxoglutarate ferredoxin oxidoreductase, gamma chain                                                                                                                                                                                                                                 | PCAR_1028<br>PCAR_1547                              | SYN_00157<br>SYN_02500                          | SFUM_0015<br>SFUM_0299<br>SFUM_1168<br>SFUM_3140     | PproDRAFT_0816                                   |                                                                        | kustc0447                                  | TTE1211<br>TTE1342                                      |
| Cloam0296    | korB        | 2-oxoglutarate ferredoxin oxidoreductase, beta chain                                                                                                                                                                                                                                  | PCAR_1029<br>PCAR_1546                              | SYN_03163<br>SYN_02499                          | SFUM_1167<br>SFUM_3139                               | PproDRAFT_0817                                   | SWOL_0037<br>SWOL_1399                                                 | kustc0358<br>kustc1056                     | TTE1210<br>TTE1341                                      |
| Cloam0297    | korA        | 2-oxoglutarate ferredoxin oxidoreductase, alpha chain                                                                                                                                                                                                                                 | PCAR_1030<br>PCAR_1545                              | SYN_02498                                       | SFUM_0017<br>SFUM_0301<br>SFUM_1166<br>SFUM_3138     | PproDRAFT_2555<br>PproDRAFT_0818                 | SWOL_0036<br>SWOL_1400                                                 | kustc0357<br>kustc1055                     | TTE0961<br>TTE1209<br>TTE1340<br>TTE2198                |
| Cloam0298    | korD        | putative 2-oxoglutarate ferredoxin oxidoreductase, delta chain (partial)                                                                                                                                                                                                              | PCAR_1031                                           | SYN_02497                                       | SFUM_1165                                            | PproDRAFT_0839                                   | SWOL_1401                                                              | kustc1054                                  | TTE1349                                                 |

|           |          |                                                                                                                              |                                     |                        |                                     |                                                    |                                                               |                                     |                                          |
|-----------|----------|------------------------------------------------------------------------------------------------------------------------------|-------------------------------------|------------------------|-------------------------------------|----------------------------------------------------|---------------------------------------------------------------|-------------------------------------|------------------------------------------|
| Cloam0324 | por-like | putative pyruvate-ferredoxin oxidoreductase (por-like) or pyruvate-flavodoxin oxidoreductase (ydbK-like), 4Fe-4S domain      | PCAR_0377<br>PCAR_1034              | SYN_00155<br>SYN_02201 |                                     | PproDRAFT_2765<br>PproDRAFT_2790                   |                                                               | kuste4371                           | TTE0445                                  |
| Cloam0445 | hcp      | Hydroxylamine reductase (Hybrid-cluster protein) (HCP)                                                                       | PCAR_0837<br>PCAR_2872              | SYN_02614<br>SYN_02993 | SFUM_3446                           | PproDRAFT_2430<br>PproDRAFT_0430<br>PproDRAFT_0717 | SWOL_2190                                                     |                                     | TTE2772                                  |
| Cloam0448 | hydEF    | Fe-hydrogenase assembly protein (partial, N-terminal), S-adenosylmethionine(SAM) radical protein                             | PCAR_1607<br>PCAR_1632<br>PCAR_1722 | SYN_02134              | SFUM_0841<br>SFUM_1844              | PproDRAFT_3330                                     | SWOL_1020                                                     | kustc0276                           | TTE1073<br>TTE1885                       |
| Cloam0762 | _        | putative tetraacyldisaccharide 4'-kinase                                                                                     | PCAR_1261                           | SYN_01563              |                                     | PproDRAFT_0658                                     |                                                               |                                     |                                          |
| Cloam0804 | mutB     | Methylmalonyl-CoA mutase large subunit (MCM-alpha)                                                                           |                                     |                        | SFUM_0457<br>SFUM_0458              | PproDRAFT_2511<br>PproDRAFT_2234                   |                                                               |                                     | TTE1217<br>TTE1218<br>TTE2388<br>TTE2389 |
| Cloam0805 | argK     | ATPase/kinase associated with arginine transport                                                                             |                                     |                        | SFUM_0456                           | PproDRAFT_2510<br>PproDRAFT_2233                   |                                                               |                                     | TTE2387                                  |
| Cloam0806 | _        | putative bifunctional signal transducer for sigma factor regulation / phosphoserine phosphatase                              |                                     | SYN_02359              | SFUM_2204                           | PproDRAFT_3299                                     |                                                               |                                     |                                          |
| Cloam0896 | _        | putative tRNA (5-methylaminomethyl-2-thiouridylate)-methyltransferase / fibronectin/fibrinogen-binding protein (EC 2.1.1.61) | PCAR_2769                           | SYN_01419              | SFUM_1061                           | PproDRAFT_2331                                     | SWOL_1163                                                     | kustc0769                           |                                          |
| Cloam0902 | _        | putative enzyme with radical SAM domain                                                                                      | PCAR_0308                           | SYN_01240              | SFUM_0354<br>SFUM_1995              | PproDRAFT_1527                                     | SWOL_2293                                                     | kustd1804                           | TTE1955                                  |
| Cloam0918 | hgdC     | Activator of (R)-2-hydroxyglutaryl-CoA dehydratase                                                                           | PCAR_2727                           | SYN_01576<br>SYN_00371 | SFUM_1829<br>SFUM_3160              | PproDRAFT_2504                                     | SWOL_0411<br>SWOL_0428<br>SWOL_0452<br>SWOL_0632<br>SWOL_2557 | kuste3118<br>kuste2937<br>kuste2937 | TTE0319<br>TTE1113<br>TTE1991            |
| Cloam0921 | hydG     | Fe-hydrogenase assembly protein, S-adenosylmethionine radical (SAM) protein                                                  | PCAR_0340<br>PCAR_0608<br>PCAR_1631 | SYN_02133              | SFUM_0842<br>SFUM_1822<br>SFUM_1841 | PproDRAFT_3329                                     | SWOL_1022                                                     | kustc0273                           | TTE1568                                  |
| Cloam0936 | _        | DNA/RNA helicases, SNF2 family                                                                                               |                                     | SYN_01827              |                                     | PproDRAFT_2831                                     | SWOL_1550                                                     | kustc0342                           |                                          |
| Cloam0991 | _        | MotA/ToIQ/ExbB proton channel family protein (fragment)                                                                      | PCAR_0848<br>PCAR_1505<br>PCAR_2978 | SYN_00185              |                                     |                                                    |                                                               | kustc0780<br>kustc0915              | TTE0631                                  |
| Cloam1001 | vorD     | pyruvate:ferredoxin and related 2-oxoacid:ferredoxin oxidoreductases, delta subunit                                          | PCAR_1544<br>PCAR_2248              | SYN_02496              | SFUM_0302<br>SFUM_3137              | PproDRAFT_0839                                     | SWOL_1401                                                     | kustc0356<br>kustc1054<br>kustc0566 | TTE1216<br>TTE1601<br>TTE2199            |

|           |      |                                                                                                                                                                       |                                                                                         |                                                               |                                                  |                                                    |                                                                            |                                                                    |                               |
|-----------|------|-----------------------------------------------------------------------------------------------------------------------------------------------------------------------|-----------------------------------------------------------------------------------------|---------------------------------------------------------------|--------------------------------------------------|----------------------------------------------------|----------------------------------------------------------------------------|--------------------------------------------------------------------|-------------------------------|
| Cloam1002 | vorA | pyruvate:ferredoxin and related 2-oxoacid:ferredoxin oxidoreductases, alpha subunit                                                                                   | PCAR_1030<br>PCAR_1545                                                                  | SYN_02498                                                     | SFUM_0017<br>SFUM_0301<br>SFUM_1166<br>SFUM_3138 | PproDRAFT_2555<br>PproDRAFT_0818                   | SWOL_0036<br>SWOL_1400                                                     | kustc0357<br>kustc1055<br>kustc1117                                | TTE1209<br>TTE1340<br>TTE2198 |
| Cloam1003 | vorB | pyruvate:ferredoxin and related 2-oxoacid:ferredoxin oxidoreductases, beta subunit                                                                                    | PCAR_1029<br>PCAR_1546                                                                  | SYN_02499                                                     | SFUM_0016<br>SFUM_0300<br>SFUM_1167<br>SFUM_3139 | PproDRAFT_0817                                     | SWOL_0037<br>SWOL_1399                                                     | kustc0358<br>kustc1056                                             | TTE1210<br>TTE1341            |
| Cloam1004 | vorC | pyruvate:ferredoxin and related 2-oxoacid:ferredoxin oxidoreductases, gamma subunit                                                                                   | PCAR_1028<br>PCAR_1547                                                                  | SYN_02500                                                     | SFUM_0299<br>SFUM_1168<br>SFUM_3140              | PproDRAFT_0816                                     | SWOL_0038<br>SWOL_1398                                                     | kustc0359                                                          | TTE1342                       |
| Cloam1022 | hppA | Pyrophosphate-energized proton pump (Pyrophosphate-energized inorganic pyrophosphatase) (H <sup>+</sup> -PPase) (Membrane-bound proton-translocating pyrophosphatase) | PCAR_2001                                                                               | SYN_02772                                                     | SFUM_2995<br>SFUM_3037                           | PproDRAFT_0649                                     |                                                                            | kustd1836                                                          | TTE0284                       |
| Cloam1037 | iorB | indolepyruvate ferredoxin oxidoreductase, beta chain                                                                                                                  | PCAR_1568                                                                               | SYN_01198                                                     | SFUM_0299<br>SFUM_4076                           | PproDRAFT_0559                                     | SWOL_1195                                                                  |                                                                    | TTE2193                       |
| Cloam1038 | iorA | indolepyruvate ferredoxin oxidoreductase, alpha chain                                                                                                                 | PCAR_1567<br>PCAR_2117                                                                  | SYN_01197                                                     | SFUM_4075                                        | PproDRAFT_0560                                     | SWOL_1196                                                                  |                                                                    | TTE2194                       |
| Cloam1039 | _    | putative 4-alpha-glucanotransferase                                                                                                                                   | PCAR_0554                                                                               | SYN_01069                                                     | SFUM_3452                                        | PproDRAFT_3725<br>PproDRAFT_3112                   |                                                                            | kuste3059                                                          |                               |
| Cloam1069 | _    | putative lipid-A-disaccharide synthase                                                                                                                                | PCAR_1258                                                                               | SYN_01565                                                     |                                                  | PproDRAFT_0662                                     |                                                                            | kuste4276                                                          |                               |
| Cloam1167 | pcm  | L-isoaspartate protein carboxylmethyltransferase type II                                                                                                              | PCAR_1427                                                                               | SYN_01000                                                     | SFUM_2181<br>SFUM_2480                           | PproDRAFT_0494<br>PproDRAFT_0095                   | SWOL_2438                                                                  | kustc1123                                                          |                               |
| Cloam1168 | surE | broad specificity 5'(3')-nucleotidase and polyphosphatase                                                                                                             | PCAR_1426                                                                               | SYN_01984                                                     | SFUM_1169                                        | PproDRAFT_0493                                     | SWOL_1150                                                                  | kuste3079                                                          | TTE1338                       |
| Cloam1180 | hymC | [Fe] hydrogenase (Fe-only hydrogenase) (ferredoxin bidirectional hydrogenase), subunit alpha                                                                          | PCAR_1605<br>PCAR_1633<br>PCAR_2502                                                     | SYN_00151<br>SYN_01370<br>SYN_02427<br>SYN_01649              | SFUM_0844<br>SFUM_0848<br>SFUM_2714              | PproDRAFT_3331                                     | SWOL_1017<br>SWOL_1925<br>SWOL_2436                                        |                                                                    | TTE0894                       |
| Cloam1181 |      | putative [Fe] hydrogenase (Fe-only hydrogenase) (ferredoxin bidirectional hydrogenase), subunit beta (hymB-like)                                                      | PCAR_0208<br>PCAR_0834<br>PCAR_0914<br>PCAR_1604<br>PCAR_1634<br>PCAR_1844<br>PCAR_2708 | SYN_00631<br>SYN_02426<br>SYN_01648                           | SFUM_0845<br>SFUM_1955<br>SFUM_2704<br>SFUM_2713 | PproDRAFT_3523<br>PproDRAFT_3332<br>PproDRAFT_2631 | SWOL_0657<br>SWOL_0784<br>SWOL_1018<br>SWOL_1024<br>SWOL_1701<br>SWOL_1828 | kuste2664<br>kuste2507<br>kustd1551<br>kustc0827<br>kustc0713 nuoF | TTE0893                       |
| Cloam1182 |      | putative [Fe] hydrogenase (Fe-only hydrogenase) (ferredoxin bidirectional hydrogenase), subunit gamma (hymA-like)                                                     | PCAR_0207<br>PCAR_0833<br>PCAR_0913<br>PCAR_1602<br>PCAR_1636<br>PCAR_1846              | SYN_00153<br>SYN_02139<br>SYN_01369<br>SYN_02425<br>SYN_01647 | SFUM_0846<br>SFUM_1956<br>SFUM_2703<br>SFUM_2712 | PproDRAFT_3521<br>PproDRAFT_3333                   | SWOL_0656<br>SWOL_0783<br>SWOL_1019<br>SWOL_1025<br>SWOL_1702<br>SWOL_1829 | kuste2663<br>kuste2509<br>kustd1552<br>kustc0826<br>kustc0714 nuoE | TTE0890                       |

|           |      |                                                                                                          |                                                                                         |                                                               |                                                  |                                                    |                                                                            |                                                                    |                               |
|-----------|------|----------------------------------------------------------------------------------------------------------|-----------------------------------------------------------------------------------------|---------------------------------------------------------------|--------------------------------------------------|----------------------------------------------------|----------------------------------------------------------------------------|--------------------------------------------------------------------|-------------------------------|
| Cloam1183 | hymB | [Fe] hydrogenase (Fe-only hydrogenase) (ferredoxin bidirectional hydrogenase), subunit beta              | PCAR_0208<br>PCAR_0834<br>PCAR_0914<br>PCAR_1604<br>PCAR_1634<br>PCAR_1844<br>PCAR_2708 | SYN_00631<br>SYN_02426<br>SYN_01648                           | SFUM_0845<br>SFUM_1955<br>SFUM_2704<br>SFUM_2713 | PproDRAFT_3523<br>PproDRAFT_3332<br>PproDRAFT_2631 | SWOL_0657<br>SWOL_0784<br>SWOL_1018<br>SWOL_1024<br>SWOL_1701<br>SWOL_1828 | kustc0713<br>kustd0827<br>kustd1551<br>kuste2507<br>kuste2664 nuoF | TTE0893                       |
| Cloam1184 |      | putative ferredoxin, 2Fe-2S (thioferredoxin-like [2Fe-2S] ferredoxin) (hymB-like partial match)          | PCAR_1603                                                                               |                                                               |                                                  | PproDRAFT_3522                                     |                                                                            | kuste2507<br>kustd1551<br>kustc0827 nuoF                           | TTE0892                       |
| Cloam1186 | hymA | [Fe] hydrogenase (Fe-only hydrogenase) (ferredoxin bidirectional hydrogenase), subunit gamma             | PCAR_0207<br>PCAR_0833<br>PCAR_0913<br>PCAR_1602<br>PCAR_1636<br>PCAR_1846              | SYN_00153<br>SYN_02139<br>SYN_01369<br>SYN_02425<br>SYN_01647 | SFUM_0846<br>SFUM_1956<br>SFUM_2703<br>SFUM_2712 | PproDRAFT_3521<br>PproDRAFT_3333                   | SWOL_0656<br>SWOL_0783<br>SWOL_1019<br>SWOL_1025<br>SWOL_1702<br>SWOL_1829 | kuste2509<br>kustd1552<br>kustc0826<br>kustc0714 nuoE              | TTE0890                       |
| Cloam1250 |      | putative 4Fe-4S ferredoxin-type protein (yccM)                                                           | PCAR_1070                                                                               | SYN_02058                                                     | SFUM_1960                                        | PproDRAFT_0474                                     | SWOL_2462                                                                  | kuste4192                                                          | TTE1096                       |
| Cloam1251 |      | putative ferredoxin, 4Fe-4S; putative signal peptide                                                     |                                                                                         |                                                               |                                                  |                                                    | SWOL_2105                                                                  | kuste4015                                                          |                               |
| Cloam1253 | nrdD | Anaerobic ribonucleoside-triphosphate reductase (Oxygen-sensitive ribonucleoside-triphosphate reductase) | PCAR_2734                                                                               | SYN_03522                                                     |                                                  |                                                    | SWOL_2273                                                                  | kustd1730                                                          | TTE1850                       |
| Cloam1254 | nrdG | putative anaerobic ribonucleotide reductase activating enzyme                                            | PCAR_2732                                                                               | SYN_03523                                                     |                                                  |                                                    | SWOL_2272                                                                  | kustd1729                                                          | TTE1849                       |
| Cloam1255 | _    | putative enzyme with radical SAM domain protein (Fe-S oxidoreductase)                                    | PCAR_2195<br>PCAR_2585                                                                  | SYN_00436<br>SYN_01355                                        | SFUM_1610<br>SFUM_3475                           | PproDRAFT_3707<br>PproDRAFT_2268                   | SWOL_1616                                                                  | kustd1893                                                          | TTE0909                       |
| Cloam1334 | _    | radical SAM domain protein                                                                               | PCAR_1897                                                                               |                                                               |                                                  | PproDRAFT_2559                                     |                                                                            | kuste4178                                                          |                               |
| Cloam1367 | rbr  | rubrerythrin (RR) (rubredoxin-dependent, iron-containing peroxidase)                                     | PCAR_0084<br>PCAR_2346<br>PCAR_2797                                                     | SYN_00469<br>SYN_02523                                        | SFUM_2468<br>SFUM_3252                           | PproDRAFT_1924<br>PproDRAFT_1433                   | SWOL_0670                                                                  | kuste4364                                                          | TTE0487                       |
| Cloam1368 | rub  | rubredoxin-type Fe(Cys) <sub>4</sub> protein                                                             | PCAR_1856<br>PCAR_2460<br>PCAR_2796                                                     | SYN_02123<br>SYN_01385<br>SYN_01383<br>SYN_02492              | SFUM_0689<br>SFUM_2935<br>SFUM_3222              | PproDRAFT_2160<br>PproDRAFT_1971                   | SWOL_2054                                                                  | kustc0323<br>kustc1169<br>kustd2038                                | TTE0487<br>TTE2154            |
| Cloam1471 | ahcY | S-adenosyl-L-homocysteine hydrolase                                                                      | PCAR_1924                                                                               | SYN_00416                                                     | SFUM_0366                                        | PproDRAFT_2020                                     | SWOL_1128                                                                  | kustb0200                                                          |                               |
| Cloam1492 | _    | putative enzyme with radical SAM domain protein (Fe-S oxidoreductase)                                    |                                                                                         | SYN_01173                                                     | SFUM_0361                                        | PproDRAFT_1436                                     |                                                                            | kuste4353                                                          |                               |
| Cloam1513 | _    | putative Na <sup>+</sup> -transporting methylmalonyl-CoA/oxaloacetate decarboxylase, beta subunit        |                                                                                         | SYN_01431<br>SYN_00115                                        | SFUM_3585                                        |                                                    |                                                                            | kustd2061                                                          | TTE0252<br>TTE1215<br>TTE1798 |

|           |      |                                                                                                                                  |                                                                                         |                                                                            |                                                  |                                                                      |                                                                            |                                                               |                    |
|-----------|------|----------------------------------------------------------------------------------------------------------------------------------|-----------------------------------------------------------------------------------------|----------------------------------------------------------------------------|--------------------------------------------------|----------------------------------------------------------------------|----------------------------------------------------------------------------|---------------------------------------------------------------|--------------------|
| Cloam1515 | -    | putative enzyme with radical SAM domain protein (Fe-S oxidoreductase)                                                            |                                                                                         | SYN_03236<br>SYN_01999                                                     | SFUM_0616<br>SFUM_1696                           | PproDRAFT_1841                                                       |                                                                            |                                                               | TTE1779            |
| Cloam1517 | -    | conserved hypothetical protein; putative Fe-S oxidoreductase, related to NifB/MoaA family                                        |                                                                                         |                                                                            |                                                  | PproDRAFT_0158                                                       | SWOL_1326                                                                  |                                                               | TTE1620            |
| Cloam1523 | rnfB | electron transport complex protein rnfB, polyferredoxin subunit (rnfB module)                                                    | PCAR_0264                                                                               | SYN_00628<br>SYN_01658                                                     | SFUM_2694<br>SFUM_2793                           |                                                                      |                                                                            | kustd1690                                                     |                    |
| Cloam1524 | rnfA | electron transport complex protein rnfA polyferredoxin subunit                                                                   | PCAR_0260<br>PCAR_0265                                                                  | SYN_01659                                                                  | SFUM_2695                                        |                                                                      |                                                                            | kustc0732                                                     |                    |
| Cloam1525 | rnfE | electron transport complex protein rnfE, polyferredoxin subunit                                                                  | PCAR_0260                                                                               | SYN_01661                                                                  | SFUM_2696                                        |                                                                      |                                                                            | kustc0731                                                     |                    |
| Cloam1527 | rnfD | electron transport complex protein rnfD, polyferredoxin subunit                                                                  | PCAR_0262                                                                               | SYN_01663                                                                  | SFUM_2698                                        |                                                                      |                                                                            | kuste4658                                                     |                    |
| Cloam1528 | rnfC | electron transport complex protein rnfC, NAD and 4Fe-4S binding, polyferredoxin subunit                                          | PCAR_0263                                                                               | SYN_01664                                                                  | SFUM_2699                                        |                                                                      |                                                                            | kuste4657                                                     |                    |
| Cloam1683 | -    | putative enzyme with radical SAM domain protein (Fe-S oxidoreductase)                                                            | PCAR_0494                                                                               |                                                                            |                                                  | PproDRAFT_2612                                                       | SWOL_1016                                                                  |                                                               | TTE0992            |
| Cloam1685 |      | [Fe] hydrogenase (Fe-only hydrogenase) (ferredoxin bidirectional hydrogenase), subunit beta (hymB-like); putative signal peptide | PCAR_0208<br>PCAR_0834<br>PCAR_0914<br>PCAR_1604<br>PCAR_1634<br>PCAR_1844<br>PCAR_2708 | SYN_00152<br>SYN_00631<br>SYN_02139<br>SYN_01369<br>SYN_02426<br>SYN_01648 | SFUM_0845<br>SFUM_1955<br>SFUM_2704<br>SFUM_2713 | PproDRAFT_3523<br>PproDRAFT_3332<br>PproDRAFT_2631                   | SWOL_0657<br>SWOL_0784<br>SWOL_1018<br>SWOL_1024<br>SWOL_1701<br>SWOL_1828 | kustc0827<br>kustc0713<br>kustd1551<br>kuste2664<br>kuste2507 | TTE0893<br>TTE1605 |
| Cloam1686 |      | [Fe] hydrogenase (Fe-only hydrogenase) (ferredoxin bidirectional hydrogenase), subunit gamma (hymA-like)                         | PCAR_0833<br>PCAR_0913<br>PCAR_1602<br>PCAR_1636<br>PCAR_1846                           | SYN_00153<br>SYN_02425<br>SYN_01647                                        | SFUM_0846<br>SFUM_1956<br>SFUM_2703<br>SFUM_2712 | PproDRAFT_3521<br>PproDRAFT_3797<br>PproDRAFT_3333<br>PproDRAFT_2630 | SWOL_0656<br>SWOL_0783<br>SWOL_1019<br>SWOL_1025<br>SWOL_1702<br>SWOL_1829 | kustc0826<br>kustc0714<br>kustd1552<br>kuste2663<br>kuste2509 | TTE0890            |
| Cloam1702 | gmhA | phosphoheptose isomerase                                                                                                         | PCAR_1270                                                                               | SYN_01980                                                                  | SFUM_3206                                        | PproDRAFT_0702                                                       |                                                                            | kuste3303                                                     | TTE0762            |
| Cloam1876 | fprA | Nitric oxide reductase (Type A flavoprotein) (FMN-protein) (Flavoprotein A)                                                      | PCAR_2795<br>PCAR_2871                                                                  | SYN_00511                                                                  | SFUM_3253                                        | PproDRAFT_2432<br>PproDRAFT_0428<br>PproDRAFT_0625                   | SWOL_2054<br>SWOL_2363                                                     | kuste3160                                                     | TTE1000            |

**Supplementary Table 4 :** Set of genes shared between *Cloacamonas acidaminovorans* and 7 anaerobic bacterial genomes showing the highest similarity results. Bacterial genomes known to develop syntrophic interactions are shown in red (see Suppl. Table 1). Homologous genes have been computed using a blastP alignment threshold of at least 30% sequence identity on 80% of the length of the smallest protein. Corresponding gene locus\_tag of each compared genome are given. The selection shown here is limited to mainly metabolic functions involved in anaerobic conditions.
