# Supplementary material
Source: PubMed Central journal article supplement (PMC2293186)
Supplement: jbacter_190_7_2572__6.pdf [file jbacter_190_7_2572__6.pdf]

| Digesters          | Country        | WWE1 | <i>C. acidaminovorans</i> | Scale <sup>a</sup> | Process <sup>b</sup> | Effluent <sup>c</sup>                     | T°C <sup>d</sup> |
|--------------------|----------------|------|---------------------------|--------------------|----------------------|-------------------------------------------|------------------|
| Aix en Provence    | France         | +    | +                         | I                  | CST                  | W                                         | M                |
| Aix en Provence    | France         | +    | +                         | I                  | CST                  | W                                         | T                |
| Asnières sur Oise  | France         | +    | -                         | I                  | CST                  | W                                         | M                |
| Bilten             | Switzerland    | +    | +                         | I                  | CST                  | W + 40% paper, food, textile industry     | M                |
| Brno               | Czech Republic | +    | +                         | I                  | CST                  | W + 30% dairy, food industry              | M                |
| Casolino           | Italy          | +    | -                         | I                  | CST                  | W + 15% industry, heavy metals            | M                |
| Cholet             | France         | +    | +                         | I                  | CST                  | W + 9% slaughterhouse                     | M                |
| Clos de Hilde      | France         | -    | -                         | I                  | CST                  | W                                         | M                |
| Conneré            | France         | +    | -                         | I                  | FBR                  | cassoulet and sauerkraut                  | M                |
| Corbeil            | France         | +    | +                         | I                  | CST                  | W                                         | M                |
| Cork               | Ireland        | +    | +                         | I                  | UASB                 | citric acid from beet molasses production | M                |
| Creil              | France         | +    | +                         | I                  | CST                  | W                                         | M                |
| Culiacan           | Mexico         | -    | -                         | I                  | CST                  | W                                         | M                |
| El Trebal          | Chili          | -    | -                         | I                  | CST                  | W                                         | M                |
| Evry               | France         | +    | +                         | I                  | CST                  | W                                         | M                |
| Goslar             | Germany        | +    | -                         | I                  | CST                  | W                                         | M                |
| Haguenau           | France         | +    | -                         | I                  | CST                  | W + 30% mechanical, food industry         | M                |
| La Roche sur Foron | France         | +    | -                         | I                  | CST                  | W + 50% food industry                     | M                |
| Les Mureaux        | France         | +    | -                         | P                  | CST                  | W                                         | M                |
| Manheim            | Germany        | +    | -                         | I                  | CST                  | W + 50% paper industry                    | M                |
| Marseille          | France         | -    | -                         | I                  | CST                  | W                                         | M                |
| Marseille          | France         | -    | -                         | I                  | CST                  | W                                         | M                |
| Mexico city        | Mexico         | +    | +                         | L                  | UASB                 | rum vinasses                              | M                |
| Mexico city        | Mexico         | +    | -                         | L                  | FBR                  | rum vinasses                              | M                |
| Mexico city        | Mexico         | +    | +                         | I                  | UASB                 | yeast factory                             | M                |
| Montardon          | France         | +    | -                         | P                  | SBR                  | pig slurry                                | M                |
| Montreal           | Canada         | +    | +                         | I                  | CST                  | W                                         | M                |
| Montreal           | Canada         | +    | +                         | L                  | UASB                 | phenolic compounds                        | M                |
| Mulheim            | Germany        | +    | -                         | I                  | CST                  | W + green wastes                          | M                |

|                         |                |   |   |   |      |                                    |   |
|-------------------------|----------------|---|---|---|------|------------------------------------|---|
| Narbonne                | France         | + | - | L | SBR  | pig slurry                         | M |
| Narbonne                | France         | + | - | L | SBR  | pig slurry                         | M |
| Narbonne                | France         | + | - | L | UASB | lignin                             | M |
| Narbonne                | France         | - | - | P | FBR  | vinasses                           | M |
| Narbonne                | France         | - | - | L | FBR  | vinasses                           | M |
| Palencia                | Spain          | + | - | I | CST  | W + food industry                  | M |
| Puebla                  | Mexico         | - | - | I | CST  | W + 20% textile, coloring industry | M |
| Rochefort               | France         | - | - | I | CST  | W + 12% industry, heavy metals     | M |
| Roquetas de mar         | Spain          | - | - | I | CST  | W + 15% paper industry             | M |
| Rostock                 | Germany        | + | + | I | CST  | W + 28% food industry              | M |
| Saint-Laurent de Cognac | France         | + | - | I | FB   | acidogenic vinasses                | M |
| Saint-Laurent de Cognac | France         | + | - | I | FB   | acidogenic vinasses                | M |
| Saint-Laurent de Cognac | France         | + | - | I | CST  | lees vinasses                      | M |
| Zabreh                  | Czech Republic | - | - | I | CST  | W + 30% food industry              | T |

a: (I) Industrial scale, (L) lab scale, (P) Pilot scale.

b: (CST) Continuously Stirred Tank, (FB) Fixed Biofilm, (FBR) Fluidized Bed Reactor, (UASB) Up flow Anaerobic Sludge Blanket

c: (W) wastewater

d: (M) mesophile, (T) thermophile

**Supplementary table 5 : WWE1 and *C. acidaminovorans* PCR detection in several anaerobic digesters**
